# Supplementary material for: Palladium catalysed cross-dehydrogenative-coupling of 1,3,5-trialkoxybenzenes with simple arenes
Source: Royal Society of Chemistry journal article supplement (doi:10.1039/c4cc06271j), 2014-01-01
Supplement: c4cc06271j1.pdf [file c4cc06271j1.pdf]

## **Supporting Information**

### **Palladium Catalysed Cross-Dehydrogenative-Coupling (CDC) of 1,3,5-Trialkoxybenzenes with Simple Arenes**

*Thomas E. Storr, Faridah Namata and Michael F. Greaney\**

*School of Chemistry, University of Manchester,*

*Chemistry Building-4.20b, School of Chemistry, The University of Manchester, Manchester, M13 9PL, UK.*

[michael.greaney@manchester.ac.uk](mailto:michael.greaney@manchester.ac.uk)

## Contents

|                                                                    |     |
|--------------------------------------------------------------------|-----|
| • 1.1 General Experimental Details                                 | S3  |
| • 1.2 General Procedure for the Arylation of 1,3,5-Trialkoxyarenes | S3  |
| • 2 Reaction Optimisation Studies                                  | S4  |
| ○ 2.1 Table 1. Initial Reaction Conditions Assessment              | S4  |
| ○ 2.2 Table 2. Acid and Oxidant Assessment                         | S5  |
| ○ 2.3 Table 3. Catalyst and Stoichiometry Assessment               | S6  |
| ○ 2.4 Table 4. <i>Para</i> -xylene Stoichiometry                   | S7  |
| ○ 2.5 Table 5. Temperature and Time Assessment                     | S8  |
| ○ 2.5 Table 6. Optimisation of Arylation Using Benzene             | S9  |
| • 3 Characterisation Data for Compounds <b>3a-q</b>                | S10 |
| • 4 NMR Spectra for Compounds <b>3a-q</b>                          | S18 |
| • 5 Deuterium Kinetic Isotope Experiments                          | S35 |
| • 6 Plausible Mechanisms for the CDC of <b>1</b> and <b>2</b>      | S38 |
| ○ 6.1 Palladium(II/0) Cycles                                       | S38 |
| ○ 6.2 Palladium(II/IV) Cycles                                      | S39 |
| • 7 Crystal Structure of <b>3a</b>                                 | S40 |
| • 8 References                                                     | S40 |

## 1.1 General Experimental Details

Nuclear Magnetic Resonance (NMR) spectra were recorded on a 500, 400 or 300 MHz Bruker NMR spectrometers in CDCl<sub>3</sub> at 300 K (unless stated otherwise). For proton NMR, samples were prepared using ca. 10 mg of compound dissolved in 1.0 mL of CDCl<sub>3</sub> and for carbon NMR using ca. 20 mg of compound dissolved in 1.0 mL of CDCl<sub>3</sub>. All spectra were referenced to the residual solvent peak CHCl<sub>3</sub> ( $\delta$  = 7.26 ppm) for <sup>1</sup>H NMR and the CDCl<sub>3</sub> solvent peak ( $\delta$  = 77.0 ppm) for <sup>13</sup>C{<sup>1</sup>H} NMR. NMR Chemical shifts ( $\delta$ ) are reported in ppm; coupling constants (*J*) are reported in Hz; splitting patterns are assigned s = singlet, d = doublet, t = triplet, q = quartet, br = broad signal and app = the apparent multiplicity. Where possible, when mixtures of isomers were isolated, the <sup>1</sup>H NMR spectrum was used to assign the substitution patterns and the ratio of isomers using comparison to literature data and authentic compounds. When purified compounds had inseparable residual starting material present, <sup>1</sup>H NMR spectrum was used to calculate the quantity and mass of the product and is quoted in the characterisation data. High resolution mass spectrometry (HRMS) was measured using electrospray ionization or electron impact ionisation (EI) using a 0.5-1.0 mMol dm<sup>-3</sup> solution of compound in acetonitrile. Solvents, unless otherwise stated, were purchased in reagent grade or anhydrous quality and used as received. Reagents were either purchased directly from commercial suppliers or prepared according to literature procedures. All reactions were carried out in glass microwave vials equipped with aluminium crimp caps or a round bottomed flask and sealed with a glass stopper and heated in oil baths with a thermocouple temperature control. Flash column chromatography was performed manually on silica gel eluting with hexane/ethyl acetate under pressurised air flow. 1,3,5-trialkoxyarenes were synthesized from 1,3,5-trifluorobenzene and the respective alcohol according to the procedure described by Jalalian and Olofsson<sup>1</sup> or from phloroglucinol or 3,5-dimethoxyphenol and alkylhalides using literature protocols.<sup>2</sup>

## 1.2 General Procedure for the Arylation of 1,3,5-Trialkoxyarenes

To a 10 ml microwave vial, or round bottomed flask, equipped with a magnetic stirrer bar was palladium(II) acetate (5.6 mg, 25  $\mu$ mol, 10 mol%), 1,3,5-trialkoxyarene (0.25 mmol, 1.0 equiv), potassium peroxodisulfate (203 mg, 0.75 mmol, 3.0 equiv) and arene (6.25 mmol, 25 equiv). The reaction vessel was then briefly flushed with N<sub>2</sub> and trifluoroacetic acid (955  $\mu$ L, 12.5 mmol, 50 equiv) was then added under N<sub>2</sub> flow and sealed. The reaction mixture was then heated with stirring to 50 °C in an oil bath for 18 hours. After the allotted reaction time the reaction was then allowed to cool to room temperature, diluted with CH<sub>2</sub>Cl<sub>2</sub> (10 mL), filtered through cotton wool and adsorbed onto silica gel *in vacuo*. The sample was then dry loaded onto a silica gel column and purified eluting with hexane/ethyl acetate (100:0 to 95:5). The fractions containing the arylated product were then concentrated *in vacuo* to yield the pure product.

## 2 Reaction Optimisation Studies

### 2.1 Table 1. Initial Reaction Conditions Assessment

To a 10 ml microwave vial or round bottomed flask equipped with a magnetic stirrer bar was added palladium(II) acetate (5.6 mg, 25  $\mu$ mol, 10 mol%), 1,3,5-trimethoxybenzene (42.0 mg, 0.25 mmol, 1.0 equiv), potassium peroxodisulfate (203 mg, 0.75 mmol, 3.0 equiv) and *para*-xylene (771  $\mu$ L, 6.25 mmol, 25 equiv). The reaction vessel was then briefly flushed with N<sub>2</sub> and acid was then added under N<sub>2</sub> flow and sealed. The reaction mixture was then heated with stirring to 50 °C in an oil bath for 18 hours. After the allotted reaction time the reaction was then allowed to cool to room temperature, diluted with CH<sub>2</sub>Cl<sub>2</sub> (10 mL), filtered through cotton wool and adsorbed onto silica gel *in vacuo*. The sample was then dry loaded onto a silica gel column and purified eluting with hexane/ethyl acetate (100:0 to 95:5). The fractions containing the arylated product were then concentrated *in vacuo* to yield the pure product.

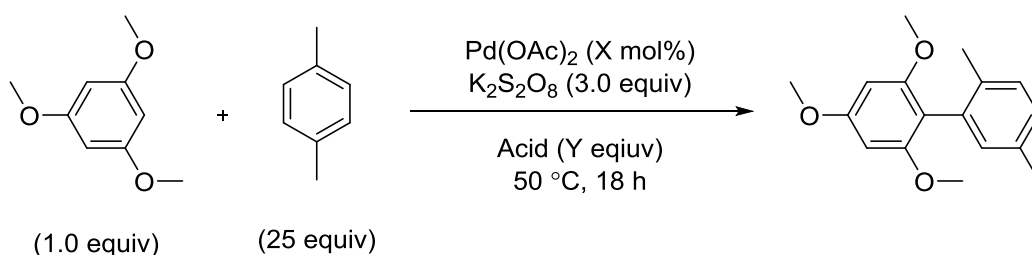

| Entry | X   | Acid                              | Y   | Isolated Yield (%) | Notes |
|-------|-----|-----------------------------------|-----|--------------------|-------|
| 1     | 10  | AcOH                              | 10  | 0                  |       |
| 2     | 100 | AcOH                              | 10  | 0                  |       |
| 3     | 10  | AcOH                              | 30  | 0                  |       |
| 4     | 10  | PivOH                             | 50  | 0                  |       |
| 5     | 10  | PivOH                             | 100 | 0                  |       |
| 6     | 5   | F <sub>3</sub> CCO <sub>2</sub> H | 30  | 56                 |       |
| 7     | 10  | F <sub>3</sub> CCO <sub>2</sub> H | 50  | 59                 |       |
| 8     | 100 | F <sub>3</sub> CCO <sub>2</sub> H | 10  | 34                 |       |

## 2.2 Table 2. Acid and Oxidant Assessment

To a 10 ml microwave vial or round bottomed flask equipped with a magnetic stirrer bar was added palladium(II) acetate (5.6 mg, 25  $\mu$ mol, 10 mol%), 1,3,5-trimethoxybenzene (42.0 mg, 0.25 mmol, 1.0 equiv), oxidant and *para*-xylene (771  $\mu$ L, 6.25 mmol, 25 equiv). The reaction vessel was then briefly flushed with N<sub>2</sub> and trifluoroacetic acid (191, 573 or 955  $\mu$ L; 10, 30 or 50 equiv) was then added under N<sub>2</sub> flow and sealed. The reaction mixture was then heated with stirring to 50 °C in an oil bath for 18 hours. After the allotted reaction time the reaction was then allowed to cool to room temperature, diluted with CH<sub>2</sub>Cl<sub>2</sub> (10 mL), filtered through cotton wool and adsorbed onto silica gel *in vacuo*. The sample was then dry loaded onto a silica gel column and purified eluting with hexane/ethyl acetate (100:0 to 95:5). The fractions containing the arylated product were then concentrated *in vacuo* to yield the pure product.

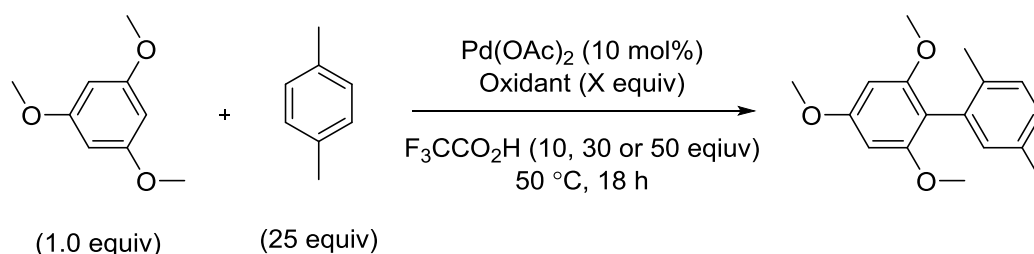

| Entry | TFA equiv | Oxidant                                                             | X         | Isolated Yield (%) | Notes               |
|-------|-----------|---------------------------------------------------------------------|-----------|--------------------|---------------------|
| 1     | 30        | K <sub>2</sub> S <sub>2</sub> O <sub>8</sub>                        | 1.0       | 48                 |                     |
| 2     | 30        | K <sub>2</sub> S <sub>2</sub> O <sub>8</sub>                        | 2.0       | 48                 |                     |
| 3     | 10        | K <sub>2</sub> S <sub>2</sub> O <sub>8</sub>                        | 3.0       | 29                 |                     |
| 4     | 30        | K <sub>2</sub> S <sub>2</sub> O <sub>8</sub>                        | 3.0       | 59                 |                     |
| 5     | 50        | K <sub>2</sub> S <sub>2</sub> O <sub>8</sub>                        | 3.0       | 64                 | Average of 5 yields |
| 6     | 100       | K <sub>2</sub> S <sub>2</sub> O <sub>8</sub>                        | 3.0       | 67                 |                     |
| 7     | 30        | K <sub>2</sub> S <sub>2</sub> O <sub>8</sub>                        | 5.0       | 46                 |                     |
| 8     | 30        | Na <sub>2</sub> S <sub>2</sub> O <sub>8</sub>                       | 3.0       | 22                 | 20% RSM             |
| 9     | 10        | Na <sub>2</sub> S <sub>2</sub> O <sub>8</sub>                       | 3.4       | 18                 |                     |
| 10    | 30        | (NH <sub>4</sub> ) <sub>2</sub> S <sub>2</sub> O <sub>8</sub>       | 3.0       | 52                 |                     |
| 11    | 50        | (NH <sub>4</sub> ) <sub>2</sub> S <sub>2</sub> O <sub>8</sub>       | 3.0       | 60                 |                     |
| 12    | 100       | (NH <sub>4</sub> ) <sub>2</sub> S <sub>2</sub> O <sub>8</sub>       | 3.0       | 68                 |                     |
| 13    | 30        | Oxone                                                               | 3.0       | 0                  |                     |
| 14    | 30        | Py.SO <sub>3</sub>                                                  | 3.0       | 0                  |                     |
| 15    | 30        | Cu(OAc) <sub>2</sub>                                                | 3.0       | 27                 |                     |
| 16    | 50        | Cu(OAc) <sub>2</sub> + K <sub>2</sub> S <sub>2</sub> O <sub>8</sub> | 3.0 + 3.0 | 52                 |                     |

### 2.3 Table 3. Catalyst and Stoichiometry Assessment

To a 10 ml microwave vial or round bottomed flask equipped with a magnetic stirrer bar was added palladium catalyst, 1,3,5-trimethoxybenzene (42.0 mg, 0.25 mmol, 1.0 equiv), oxidant (0.75 mmol, 3.0 equiv) and *para*-xylene (771  $\mu$ L, 6.25 mmol, 25 equiv). The reaction vessel was then briefly flushed with N<sub>2</sub> and trifluoroacetic acid (573, 955 or 1910  $\mu$ L; 30, 50 or 100 equiv) was then added under N<sub>2</sub> flow and sealed. The reaction mixture was then heated with stirring to 50 °C in an oil bath for 18 hours. After the allotted reaction time the reaction was then allowed to cool to room temperature, diluted with CH<sub>2</sub>Cl<sub>2</sub> (10 mL), filtered through cotton wool and adsorbed onto silica gel *in vacuo*. The sample was then dry loaded onto a silica gel column and purified eluting with hexane/ethyl acetate (100:0 to 95:5). The fractions containing the arylated product were then concentrated *in vacuo* to yield the pure product.

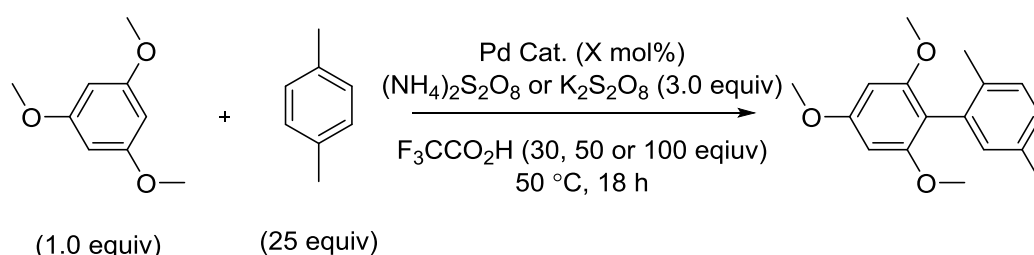

| Entry | Pd Cat.                                           | X   | TFA equiv | Oxidant                                                       | Isolated Yield (%) | Notes                                |
|-------|---------------------------------------------------|-----|-----------|---------------------------------------------------------------|--------------------|--------------------------------------|
| 1     | N/A                                               | N/A | 50        | K <sub>2</sub> S <sub>2</sub> O <sub>8</sub>                  | 0                  |                                      |
| 2     | Pd(OAc) <sub>2</sub>                              | 2   | 50        | K <sub>2</sub> S <sub>2</sub> O <sub>8</sub>                  | 25                 |                                      |
| 3     |                                                   | 5   | 50        | K <sub>2</sub> S <sub>2</sub> O <sub>8</sub>                  | 58                 |                                      |
| 4     |                                                   | 10  | 50        | K <sub>2</sub> S <sub>2</sub> O <sub>8</sub>                  | 64                 | Average of 5 yields                  |
| 5     |                                                   | 10  | 100       | K <sub>2</sub> S <sub>2</sub> O <sub>8</sub>                  | 67                 |                                      |
| 6     |                                                   | 20  | 50        | K <sub>2</sub> S <sub>2</sub> O <sub>8</sub>                  | 59                 |                                      |
| 7     | Hermann-Beller<br>Palladacycle                    | 0.5 | 30        | K <sub>2</sub> S <sub>2</sub> O <sub>8</sub>                  | 0                  |                                      |
| 8     |                                                   | 1   | 30        | K <sub>2</sub> S <sub>2</sub> O <sub>8</sub>                  | 0                  |                                      |
| 9     |                                                   | 2.5 | 30        | K <sub>2</sub> S <sub>2</sub> O <sub>8</sub>                  | 28                 |                                      |
| 10    |                                                   | 5   | 30        | K <sub>2</sub> S <sub>2</sub> O <sub>8</sub>                  | 60                 |                                      |
| 11    |                                                   | 5   | 50        | K <sub>2</sub> S <sub>2</sub> O <sub>8</sub>                  | 67                 |                                      |
| 12    |                                                   | 5   | 100       | K <sub>2</sub> S <sub>2</sub> O <sub>8</sub>                  | 64                 |                                      |
| 13    |                                                   | 5   | 30        | (NH <sub>4</sub> ) <sub>2</sub> S <sub>2</sub> O <sub>8</sub> | 57                 |                                      |
| 14    |                                                   | 5   | 50        | (NH <sub>4</sub> ) <sub>2</sub> S <sub>2</sub> O <sub>8</sub> | 67                 |                                      |
| 15    |                                                   | 5   | 100       | (NH <sub>4</sub> ) <sub>2</sub> S <sub>2</sub> O <sub>8</sub> | 65                 | 35 equiv of <i>para</i> -xylene used |
| 16    | Pd(O <sub>2</sub> CCF <sub>3</sub> ) <sub>2</sub> | 10  | 100       | K <sub>2</sub> S <sub>2</sub> O <sub>8</sub>                  | 57                 |                                      |
| 17    | Pd(acac) <sub>2</sub>                             | 10  | 100       | K <sub>2</sub> S <sub>2</sub> O <sub>8</sub>                  | 64                 |                                      |

## 2.4 Table 4. *para*-Xylene Stoichiometry

To a 10 ml microwave vial or round bottomed flask equipped with a magnetic stirrer bar was added palladium(II) acetate (5.6 mg, 25  $\mu$ mol, 10 mol%), 1,3,5-trimethoxybenzene (42.0 mg, 0.25 mmol, 1.0 equiv), potassium peroxodisulfate (203 mg, 0.75 mmol, 3.0 equiv) and *para*-xylene. The reaction vessel was then briefly flushed with N<sub>2</sub> and trifluoroacetic acid (955  $\mu$ L, 12.5 mmol, 50 equiv) was then added under N<sub>2</sub> flow and sealed. The reaction mixture was then heated with stirring to 50 °C in an oil bath for 18 hours. After the allotted reaction time the reaction was then allowed to cool to room temperature, diluted with CH<sub>2</sub>Cl<sub>2</sub> (10 mL), filtered through cotton wool and adsorbed onto silica gel *in vacuo*. The sample was then dry loaded onto a silica gel column and purified eluting with hexane/ethyl acetate (100:0 to 95:5). The fractions containing the arylated product were then concentrated *in vacuo* to yield the pure product.

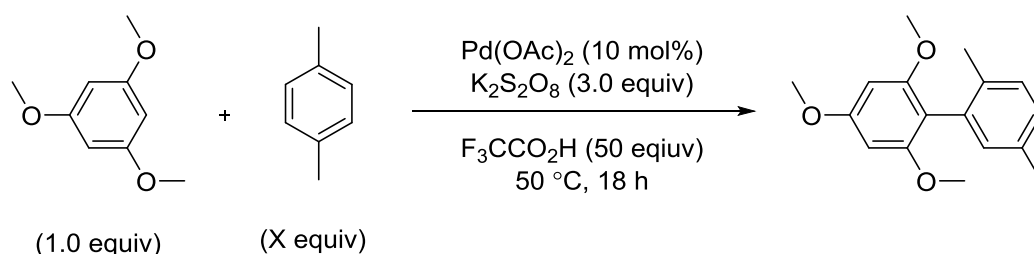

| Entry | X  | Isolated Yield (%) | Notes               |
|-------|----|--------------------|---------------------|
| 1     | 5  | 43                 |                     |
| 2     | 10 | 51                 |                     |
| 3     | 15 | 53                 |                     |
| 4     | 20 | 63                 |                     |
| 5     | 25 | 64                 | Average of 5 yields |
| 6     | 30 | 66                 |                     |
| 7     | 35 | 61                 |                     |
| 8     | 50 | 53                 |                     |

## 2.5 Table 5. Temperature and Time Assessment

To a 10 ml microwave vial or round bottomed flask equipped with a magnetic stirrer bar was added palladium(II) acetate (5.6 mg, 25  $\mu$ mol, 10 mol%), 1,3,5-trimethoxybenzene (42.0 mg, 0.25 mmol, 1.0 equiv), potassium peroxodisulfate (203 mg, 0.75 mmol, 3.0 equiv) and *para*-xylene (771  $\mu$ L, 6.25 mmol, 25 equiv). The reaction vessel was then briefly flushed with N<sub>2</sub> and trifluoroacetic acid (955  $\mu$ L, 12.5 mmol, 50 equiv) was then added under N<sub>2</sub> flow and sealed. The reaction mixture was then heated with stirring to constant temperature in an oil bath (see table for time and temperature details). After the allotted reaction time the reaction was then allowed to cool to room temperature, diluted with CH<sub>2</sub>Cl<sub>2</sub> (10 mL), filtered through cotton wool and adsorbed onto silica gel *in vacuo*. The sample was then dry loaded onto a silica gel column and purified eluting with hexane/ethyl acetate (100:0 to 95:5). The fractions containing the arylated product were then concentrated *in vacuo* to yield the pure product.

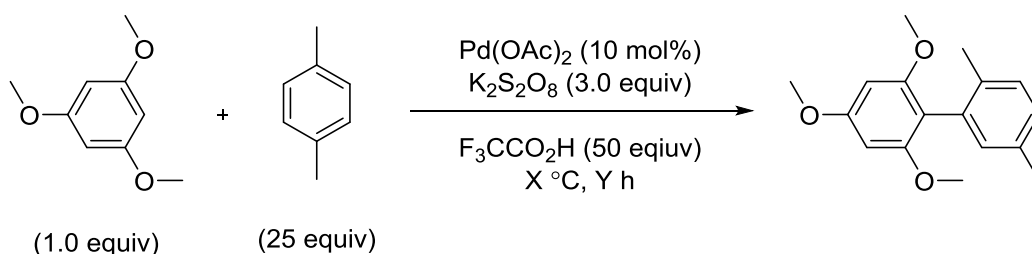

| Entry    | X         | Y         | Isolated Yield (%) | Notes                             |
|----------|-----------|-----------|--------------------|-----------------------------------|
| 1        | 0         | 18        | 33                 | Yields variable between reactions |
| 2        | 0         | 48        | 43                 | 25% RSM                           |
| 3        | 25        | 18        | 33                 |                                   |
| 4        | 50        | 1         | 34                 |                                   |
| 5        | 50        | 2         | 44                 | 22% RSM                           |
| 6        | 50        | 4         | 52                 | 33% RSM                           |
| <b>7</b> | <b>50</b> | <b>18</b> | <b>64</b>          | <b>Average of 5 yields</b>        |
| 8        | 50        | 24        | 62                 |                                   |
| 9        | 75        | 18        | 54                 |                                   |
| 10       | 100       | 18        | 38                 |                                   |



2.6 Table 6. Optimisation of Arylation Using Benzene

To a 10 ml microwave vial or round bottomed flask equipped with a magnetic stirrer bar was added palladium catalyst, 1,3,5-trimethoxybenzene (42.0 mg, 0.25 mmol, 1.0 equiv), oxidant (0.75 mmol, 3.0 equiv) and benzene (556  $\mu$ L or 1 mL, 25 or 45 equiv respectively). The reaction vessel was then briefly flushed with N<sub>2</sub> and trifluoroacetic acid was then added under N<sub>2</sub> flow and sealed. The reaction mixture was then heated with stirring to 50 °C in an oil bath for 18 hours. After the allotted reaction time the reaction was then allowed to cool to room temperature, diluted with CH<sub>2</sub>Cl<sub>2</sub> (10 mL), filtered through cotton wool and adsorbed onto silica gel *in vacuo*. The sample was then dry loaded onto a silica gel column and purified eluting with hexane/ethyl acetate (100:0 to 95:5). The fractions containing the arylated product were then concentrated *in vacuo* to yield the pure product.

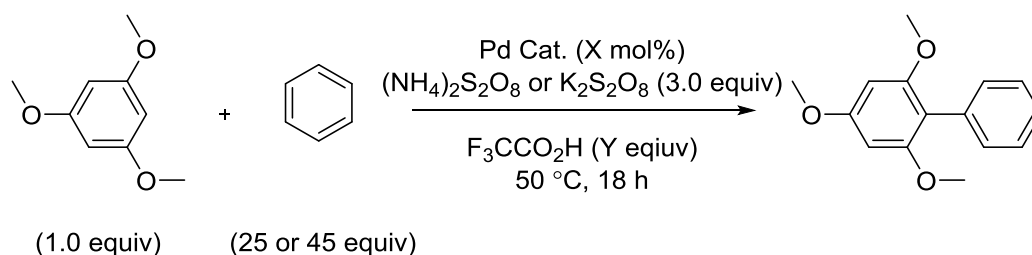

| Entry     | Benzene equiv | Pd Cat.                                             | X         | Y        | Oxidant                                                       | Isolated Yield (%) | Notes                |
|-----------|---------------|-----------------------------------------------------|-----------|----------|---------------------------------------------------------------|--------------------|----------------------|
| 1         | 25            | Pd(OAc) <sub>2</sub>                                | 10        | 50       | K <sub>2</sub> S <sub>2</sub> O <sub>8</sub>                  | 0                  |                      |
| 2         | 25            |                                                     | 10        | 25       | K <sub>2</sub> S <sub>2</sub> O <sub>8</sub>                  | 0                  |                      |
| 3         | 25            |                                                     | 10        | 10       | K <sub>2</sub> S <sub>2</sub> O <sub>8</sub>                  | 0                  |                      |
| 4         | 25            |                                                     | 10        | 5        | K <sub>2</sub> S <sub>2</sub> O <sub>8</sub>                  | 20                 |                      |
| 5         | 25            |                                                     | 10        | 2.5      | K <sub>2</sub> S <sub>2</sub> O <sub>8</sub>                  | 12                 |                      |
| 6         | 25            |                                                     | 10        | 1        | K <sub>2</sub> S <sub>2</sub> O <sub>8</sub>                  | <5                 |                      |
| 7         | 45            |                                                     | 10        | 5        | (NH <sub>4</sub> ) <sub>2</sub> S <sub>2</sub> O <sub>8</sub> | 16                 |                      |
| 8         | 45            |                                                     | 10        | 5        | Na <sub>2</sub> S <sub>2</sub> O <sub>8</sub>                 | <5                 |                      |
| 9         | 45            |                                                     | 5         | 5        | K <sub>2</sub> S <sub>2</sub> O <sub>8</sub>                  | <5                 |                      |
| 10        | 45            |                                                     | 10        | 5        | K <sub>2</sub> S <sub>2</sub> O <sub>8</sub>                  | 40                 |                      |
| 11        | 45            |                                                     | 20        | 5        | K <sub>2</sub> S <sub>2</sub> O <sub>8</sub>                  | 18                 |                      |
| 12        | 45            |                                                     | 10        | 5        | K <sub>2</sub> S <sub>2</sub> O <sub>8</sub>                  | 15                 | 4.5 equiv of oxidant |
| 13        | 45            |                                                     | 10        | 5        | K <sub>2</sub> S <sub>2</sub> O <sub>8</sub>                  | 18                 | 6.0 equiv of oxidant |
| 14        | 45            |                                                     | 10        | 5        | K <sub>2</sub> S <sub>2</sub> O <sub>8</sub>                  | <5                 | 12 equiv of oxidant  |
| 15        | 45            | Hermann-Beller<br>Palladacycle                      | 5         | 5        | K <sub>2</sub> S <sub>2</sub> O <sub>8</sub>                  | <5                 |                      |
| <b>16</b> | <b>45</b>     | <b>Pd(O<sub>2</sub>CCF<sub>3</sub>)<sub>2</sub></b> | <b>10</b> | <b>5</b> | <b>K<sub>2</sub>S<sub>2</sub>O<sub>8</sub></b>                | <b>45</b>          |                      |
| 17        | 45            | Pd(acac) <sub>2</sub>                               | 10        | 5        | K <sub>2</sub> S <sub>2</sub> O <sub>8</sub>                  | 16                 |                      |
| 18        | 45            | PdCl <sub>2</sub>                                   | 10        | 5        | K <sub>2</sub> S <sub>2</sub> O <sub>8</sub>                  | 0                  |                      |

### 3 Characterisation Data for Compounds **3a-g**

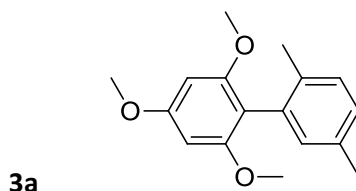

2,4,6-trimethoxy-2',5'-dimethyl-1,1'-biphenyl,<sup>3</sup> **3a**, was synthesised using the general protocol from *para*-xylene (771  $\mu$ L, 6.25 mmol) and 1,3,5-trimethoxybenzene (42.0 mg, 0.25 mmol); the title compound was isolated as a white crystalline solid (43.4 mg, 159  $\mu$ mol, 64% yield; this experiment was repeated 5 times with yields ranging from 62 to 66%, average = 64%). M.p. = 121-123  $^{\circ}$ C (lit. = 125  $^{\circ}$ C);  $^1\text{H}$  NMR (300 MHz,  $\text{CDCl}_3$ )  $\delta$  = 7.18 (d,  $J$  = 7.7, 1H), 7.07 (dd,  $J$  = 7.7, 1.5, 1H), 6.98 (d,  $J$  = 1.5, 1H), 6.26 (s, 2H), 3.90 (s, 3H), 3.73 (s, 6H), 2.36 (s, 3H), 2.06 (s, 3H);  $^{13}\text{C}$  NMR (75 MHz,  $\text{CDCl}_3$ )  $\delta$  = 160.5, 158.3, 134.5, 134.3, 133.8, 131.8, 129.3, 127.9, 111.9, 90.6, 55.8, 55.3, 21.0, 19.3; MS (ESI)  $m/z$  = 295 ( $\text{M}+\text{Na}^+$ , 100), 273 ( $\text{M}+\text{H}^+$ , 40.6); HRMS (ESI,  $\text{M}+\text{H}^+$ ) 273.1481 (Calcd. for  $\text{C}_{17}\text{H}_{21}\text{O}_3$  273.1485).

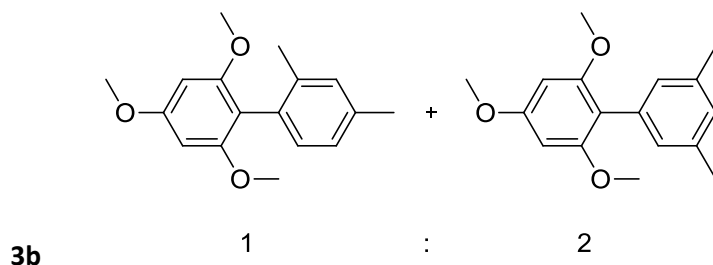

2,4,6-trimethoxy-2',4'-dimethyl-1,1'-biphenyl (A) and 2,4,6-trimethoxy-3',5'-dimethyl-1,1'-biphenyl (B),<sup>4</sup> **3b**, was synthesised using the general protocol from *meta*-xylene (764  $\mu$ L, 6.25 mmol) and 1,3,5-trimethoxybenzene (42.0 mg, 0.25 mmol); the title compound was isolated as a white solid (Run 1 = 44.7 mg, 164  $\mu$ mol, 66 % yield; Run 2 = 42.2 mg, 155  $\mu$ mol, 62% yield; average = 64% yield;  $^1\text{H}$  NMR analysis revealed that in both cases the samples were a 1:2 ratio of **A**:**B** isomers).  $^1\text{H}$  NMR (400 MHz,  $\text{CDCl}_3$ )  $\delta$  = 7.12 (s, 1H A), 7.06 (m, 2H A), 6.97 (app s, 3H B), 6.26 (s, 2H A), 6.25 (s, 2H B), 3.90 (s, 3H A), 3.89 (s, 3H B), 3.75 (s, 6H B), 3.73 (s, 6H A), 2.38 (s, 3H A), 2.37 (s, 6H B), 2.08 (s, 3H A);  $^{13}\text{C}$  NMR (101 MHz,  $\text{CDCl}_3$ )  $\delta$  = 160.4, 160.2, 158.3, 158.3, 137.5, 136.8, 136.4, 133.7, 131.0, 130.9, 130.4, 128.8, 128.5, 126.0, 112.6, 111.5, 90.7, 90.5, 55.8, 55.7, 55.3, 55.3, 21.4, 21.3, 19.7; MS (ESI)  $m/z$  = 295 ( $\text{M}+\text{Na}^+$ , 100), 273 ( $\text{M}+\text{H}^+$ , 38.4); HRMS (ESI,  $\text{M}+\text{H}^+$ ) 273.1472 (Calcd. for  $\text{C}_{17}\text{H}_{21}\text{O}_3$  273.1485).

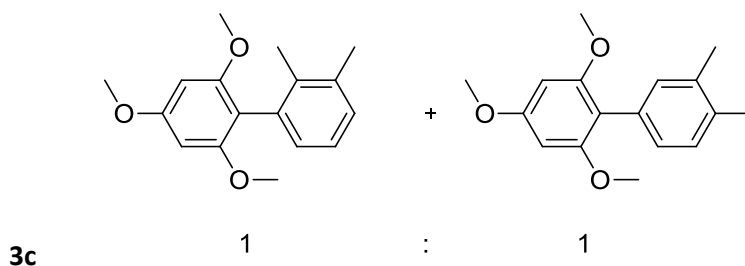

2,4,6-trimethoxy-2',3'-dimethyl-1,1'-biphenyl (A), 2,4,6-trimethoxy-3',4'-dimethyl-1,1'-biphenyl (B), **3c**, was synthesised using the general protocol from *ortho*-xylene (755  $\mu$ L, 6.25 mmol) and 1,3,5-trimethoxybenzene (42.0 mg, 0.25 mmol); the title compound was isolated as an off white solid (Run 1 = 23.0 mg, 85  $\mu$ mol, 34 % yield; Run 2 =

23.0 mg, 85  $\mu\text{mol}$ , 34% yield; average = 34% yield;  $^1\text{H}$  NMR analysis revealed that in both cases the sample was a 1:1 ratio of **A**:**B** isomers).  $^1\text{H}$  NMR (400 MHz,  $\text{CDCl}_3$ )  $\delta$  = 7.17 (d,  $J$  = 7.5, 1H B), 7.14 (d,  $J$  = 4.7, 2H A), 7.11 (d,  $J$  = 1.7, 1H B), 7.08 (dd,  $J$  = 1.7, 7.5, 1H B), 7.01 (t,  $J$  = 4.7, 1H A), 6.24 (s, 2H B), 6.24 (s, 2H A), 3.89 (s, 3H B), 3.88 (s, 3H A), 3.74 (s, 6H A), 7.71 (s, 6H B), 2.34 (s, 3H A), 2.29 (s, 6H B), 1.99 (s, 3H A);  $^{13}\text{C}$  NMR (101 MHz,  $\text{CDCl}_3$ )  $\delta$  = 160.4, 160.2, 158.3, 158.3, 136.3, 136.2, 135.7, 134.8, 133.9, 132.3, 131.3, 129.1, 129.0, 128.8, 128.5, 124.7, 112.4, 112.2, 90.7, 90.5, 55.8, 55.8, 55.3, 55.3, 20.7, 19.9, 19.7, 16.4; MS (ESI)  $m/z$  = 295 ( $\text{M}+\text{Na}^+$ , 100), 273 ( $\text{M}+\text{H}^+$ , 33.2); HRMS (ESI,  $\text{M}+\text{H}^+$ ) 273.1472 (Calcd. for  $\text{C}_{17}\text{H}_{21}\text{O}_3$  273.1485).

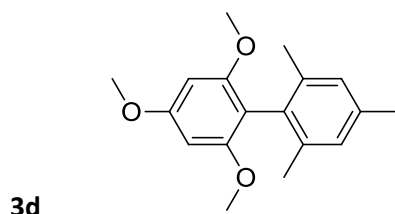

2,4,6-trimethoxy-2',4',6'-trimethyl-1,1'-biphenyl, **3d**, was synthesised using the general protocol from mesitylene (869  $\mu\text{L}$ , 6.25 mmol) and 1,3,5-trimethoxybenzene (42.0 mg, 0.25 mmol); the title compound was isolated as yellow amorphous solid (19.7 mg,  $^1\text{H}$  NMR analysis of the product sample, post silica gel chromatography, showed that it was a 7:3 mixture of **3d**:residual starting material; 55  $\mu\text{mol}$ , 22 % yield).  $^1\text{H}$  NMR (500 MHz,  $\text{CDCl}_3$ )  $\delta$  = 6.93 (s, 2H), 6.24 (s, 2H), 3.88 (s, 3H), 3.70 (s, 6H), 2.31 (s, 3H), 1.97 (s, 6H);  $^{13}\text{C}$  NMR (101 MHz,  $\text{CDCl}_3$ )  $\delta$  = 160.5, 158.1, 137.4, 136.2, 130.8, 127.8, 110.2, 90.5, 55.7, 55.3, 21.3, 20.0; MS (ESI)  $m/z$  = 309 ( $\text{M}+\text{Na}^+$ ), 287 ( $\text{M}+\text{H}^+$ , 33.5); HRMS (ESI,  $\text{M}+\text{H}^+$ ) 287.1638 (Calcd. for  $\text{C}_{18}\text{H}_{23}\text{O}_3$  287.1642).

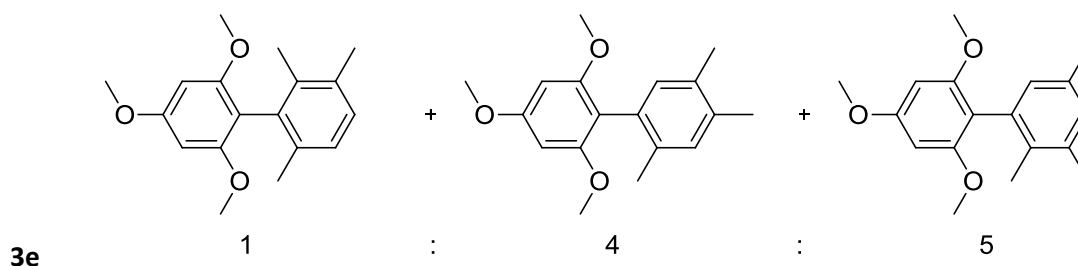

2,4,6-trimethoxy-2',3',6'-trimethyl-1,1'-biphenyl (A), 2,4,6-trimethoxy-2',4',5'-dimethyl-1,1'-biphenyl (B), 2,4,6-trimethoxy-2',3',5'-dimethyl-1,1'-biphenyl (C), **3e**, was synthesised using the general protocol from 1,2,4-trimethylbenzene (856  $\mu\text{L}$ , 6.25 mmol) and 1,3,5-trimethoxybenzene (42.0 mg, 0.25 mmol); the title compounds were isolated as a white crystalline solid (Run 1 = 41.8 mg, 146  $\mu\text{mol}$ , 58% yield; Run 2 = 52.1 mg, 182  $\mu\text{mol}$ , 73% yield; average = 66% yield;  $^1\text{H}$  NMR analysis revealed that in both cases the samples were a 1:4:5 ratio of **A**:**B**:**C** isomers).  $^1\text{H}$  NMR analysis revealed that this substance was a).  $^1\text{H}$  NMR (400 MHz,  $\text{CDCl}_3$ )  $\delta$  = 7.08 (d,  $J$  = 8.0, 1H A), 7.08 (s, 1H B), 7.04 (d,  $J$  = 8.0, 1H A), 6.99 (d,  $J$  = 1.7, 2H C), 6.94 (s, 1H B), 6.85 (d,  $J$  = 1.7, 1H C), 6.27 (s, 2H A), 6.26 (app s, 2H A + 2H B), 3.91 (s, 3H A), 3.90 (s, 3H C), 3.90 (s, 3H B), 3.74 (s, 6H B), 7.73 (s, 6H C), 3.72 (s, 6H A), 2.33 (s, 3H C), 2.32 (s, 3H C), 2.31 (s, 3H A), 2.28 (s, 3H B), 2.26 (s, 3H B), 2.05 (s, 3H B), 1.99 (s, 3H A), 1.97 (s, 3H C), 1.95 (s, 3H A);  $^{13}\text{C}$  NMR (101 MHz,  $\text{CDCl}_3$ )  $\delta$  = 160.3, 158.3, 158.3, 136.0, 135.1, 134.8, 133.8, 133.6, 133.1, 133.0, 132.3, 131.1, 131.0, 129.9, 129.5, 112.3, 111.6, 92.8, 90.5, 55.8, 55.7, 55.3, 21.0, 20.6, 19.6, 19.4, 19.1, 15.9 (Only 28 carbon

resonances observed, these can be attributed to the two major isomers - **B** and **C**); MS (ESI)  $m/z$  309 ( $M+Na^+$ ), 287 ( $M+H^+$ , 30.1); HRMS (ESI,  $M+H^+$ ) 287.1626 (Calcd. for  $C_{18}H_{23}O_3$  287.1642).

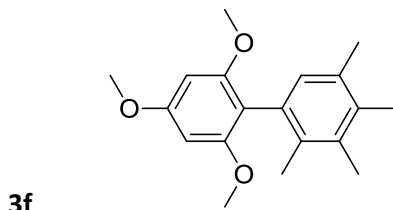

2,4,6-trimethoxy-2',3',4',5'-tetramethyl-1,1'-biphenyl, **3f**, was synthesised using the general protocol from prehenitene (931  $\mu$ L, 6.25 mmol) and 1,3,5-trimethoxybenzene (42.0 mg, 0.25 mmol); the title compound was isolated as a white crystalline solid (Run 1 = 66.2 mg, 221  $\mu$ mol, 88% yield; Run 2 = 73.7 mg, 246  $\mu$ mol, 98% yield; average = 93% yield). M.p. = 118-119  $^{\circ}$ C;  $^1H$  NMR (400 MHz,  $CDCl_3$ )  $\delta$  = 6.90 (s, 1H), 6.29 (s, 2H), 3.93 (s, 3H), 3.77 (s, 6H), 2.34 (s, 3H), 2.31 (s, 3H), 2.28 (s, 3H), 2.05 (s, 3H);  $^{13}C$  NMR (101 MHz,  $CDCl_3$ )  $\delta$  = 160.2, 158.3, 134.6, 133.7, 133.5, 132.7, 130.7, 130.0, 112.5, 90.4, 55.7, 55.2, 20.8, 17.1, 16.5, 16.2; MS (ESI)  $m/z$  = 323 ( $M+Na^+$ , 100), 301 ( $M+H^+$ , 38.8); HRMS (ESI,  $M+H^+$ ) 301.1784 (Calcd. for  $C_{19}H_{25}O_3$  301.1798).

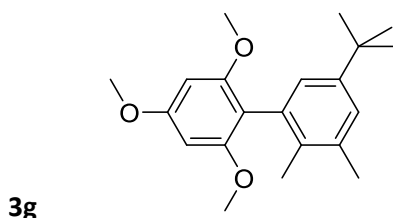

2,4,6-trimethoxy-2',3'-dimethyl-4'-tert-butyl-1,1'-biphenyl, **3g**, was synthesised using the general protocol from 3,4-dimethyl-1-tert-butylbenzene (1.16 mL, 6.25 mmol) and 1,3,5-trimethoxybenzene (42.0 mg, 0.25 mmol); the title compound was isolated as an off white solid (Run 1 = 45.0 mg, 138  $\mu$ mol, 55 % yield; Run 2 = 49.7 mg, 152  $\mu$ mol, 61% yield; average = 58% yield). M.p. = 101-103  $^{\circ}$ C;  $^1H$  NMR (400 MHz,  $CDCl_3$ )  $\delta$  = 7.18 (d,  $J$  = 2.2 Hz, 1H), 7.05 (d,  $J$  = 2.2 Hz, 1H), 6.26 (s, 2H), 3.89 (s, 3H), 3.72 (s, 6H), 2.35 (s, 3H), 1.98 (s, 3H), 1.34 (s, 9H);  $^{13}C$  NMR (101 MHz,  $CDCl_3$ )  $\delta$  = 160.41, 158.48, 146.92, 135.43, 133.44, 133.32, 126.55, 125.92, 112.93, 90.78, 55.80, 55.37, 34.19, 31.47, 21.06, 16.10; MS (ESI)  $m/z$  = 351 ( $M+Na^+$ , 100), 329 ( $M+H^+$ , 23.4); HRMS (ESI,  $M+H^+$ ) 329.2096 (Calcd. for  $C_{21}H_{29}O_3$  329.2111).

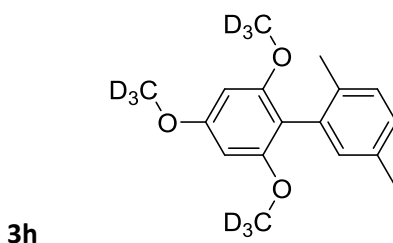

2,4,6-tris(methoxy- $d_3$ )-2',5'-dimethyl-1,1'-biphenyl, **3h**, was synthesised using the general protocol from *para*-xylene (771  $\mu$ L, 6.25 mmol) and 1,3,5-tris(methoxy- $d_3$ )-benzene (44.3 mg, 0.25 mmol); the title compound was isolated as a white crystalline solid (Run 1 = 36.4 mg, 130  $\mu$ mol, 52 % yield; Run 2 = 33.1 mg, 118  $\mu$ mol, 47% yield; average = 50%

yield). M.p. = 114-116 °C;  $^1\text{H}$  NMR (500 MHz,  $\text{CDCl}_3$ )  $\delta$  = 7.18 (d,  $J$  = 7.7, 1H), 7.07 (dd,  $J$  = 7.7, 1.5, 1H), 6.98 (d,  $J$  = 1.5, 1H), 6.24 (s, 2H), 2.35 (s, 3H), 2.06 (s, 3H);  $^{13}\text{C}$  NMR (126 MHz,  $\text{CDCl}_3$ )  $\delta$  = 160.5, 158.3, 134.6, 134.4, 133.9, 131.9, 129.4, 128.0, 111.9, 90.6, 54.7 (br m), 21.1, 19.3; MS (ESI)  $m/z$  = 304 ( $\text{M}+\text{Na}^+$ , 100), 282 ( $\text{M}+\text{H}^+$ , 47.2); HRMS (ESI,  $\text{M}+\text{H}^+$ ) 282.2038 (Calcd. for  $\text{C}_{17}\text{H}_{12}\text{D}_9\text{O}_3$  282.2050).

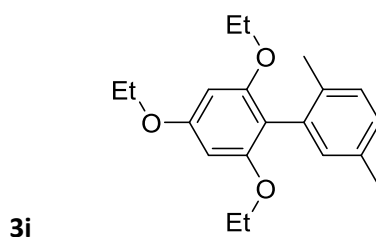

2,4,6-triethoxy-2',5'-dimethyl-1,1'-biphenyl, **3i**, was synthesised using the general protocol from *para*-xylene (771  $\mu\text{L}$ , 6.25 mmol) and 1,3,5-triethoxy-benzene (52.6 mg, 0.25 mmol); the title compound was isolated as a clear oil (Run 1 = 39.8 mg,  $^1\text{H}$  NMR analysis of the product sample, post preparative thin layer chromatography, showed that it was a 2:1 mixture of **3i**:residual starting material; 93  $\mu\text{mol}$ , 37 % yield; Run 2 = 38.0 mg,  $^1\text{H}$  NMR analysis of the product sample, post preparative thin layer chromatography, showed that it was a 18:7 mixture of **3i**:residual starting material; 96  $\mu\text{mol}$ , 38% yield; average = 38% yield).  $^1\text{H}$  NMR (500 MHz,  $\text{CDCl}_3$ )  $\delta$  = 7.21 (d,  $J$  = 7.7, 1H), 7.02 (dd,  $J$  = 7.7, 1.6, 1H), 6.98 (d,  $J$  = 1.6, 1H), 6.21 (s, 2H), 4.07 (q,  $J$  = 7.0, 2H), 3.94 (app qd,  $J$  = 7.0, 3.1, 4H), 2.32 (s, 3H), 2.06 (s, 3H), 1.45 (t,  $J$  = 7.0, 3H), 1.21 (t,  $J$  = 7.0, 6H);  $^{13}\text{C}$  NMR (126 MHz,  $\text{CDCl}_3$ )  $\delta$  = 159.5, 157.6, 134.4, 134.1, 133.8, 132.0, 129.0, 127.3, 113.3, 92.8, 64.1, 63.4, 21.0, 19.4, 14.9, 14.7; MS (ESI)  $m/z$  = 337 ( $\text{M}+\text{Na}^+$ , 100), 315 ( $\text{M}+\text{H}^+$ , 46.8); HRMS (ESI,  $\text{M}+\text{H}^+$ ) 315.1937 (Calcd. for  $\text{C}_{20}\text{H}_{27}\text{O}_3$  315.1955).

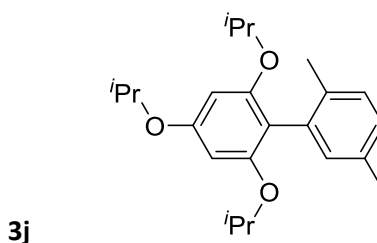

2,4,6-triisopropoxy-2',5'-dimethyl-1,1'-biphenyl, **3j**, To a 10 ml microwave vial or round bottomed flask equipped with a magnetic stirrer bar was palladium(II) acetate (5.6 mg, 25  $\mu\text{mol}$ , 10 mol%), 1,3,5-triisopropoxy-benzene (63.1 mg, 0.25 mmol, 1.0 equiv), potassium peroxodisulfate (203 mg, 0.75 mmol, 3.0 equiv) and *para*-xylene (771  $\mu\text{L}$ , 6.25 mmol, 25 equiv). The reaction vessel was then briefly flushed with  $\text{N}_2$  and trifluoroacetic acid (191  $\mu\text{L}$ , 2.5 mmol, 10 equiv) was then added under  $\text{N}_2$  flow and sealed. The reaction mixture was then heated with stirring to 50 °C in an oil bath for 18 hours. After the allotted reaction time the reaction was then allowed to cool to room temperature, diluted with dichloromethane (10 mL), filtered through cotton wool and adsorbed onto silica gel *in vacuo*. The sample was then dry loaded onto a silica gel column and purified eluting with hexane/ethyl acetate (100:0 to 95:5).\* The fractions containing the arylated product were then concentrated *in vacuo* to yield a crude sample which was further purified by preparative thin layer chromatography; the title compound was isolated as a colourless oil (25.0 mg, 70  $\mu\text{mol}$ , 28% yield).  $^1\text{H}$  NMR (400 MHz,  $\text{CDCl}_3$ )  $\delta$  = 7.08 (d,  $J$  = 7.7, 1H), 6.98 (dd,  $J$  = 7.7, 1.5, 1H), 6.94 (d,  $J$  = 1.5,

1H), 6.21 (s, 2H), 4.54 (sept,  $J = 6.0$ , 1H), 4.18 (sept,  $J = 6.0$ , 2H), 2.30 (s, 3H), 2.06 (s, 3H), 1.37 (d,  $J = 6.0$ , 6H), 1.10 (d,  $J = 6.0$ , 12H);  $^{13}\text{C}$  NMR (101 MHz,  $\text{CDCl}_3$ )  $\delta = 158.0, 157.0, 134.5, 134.4, 133.6, 132.2, 128.8, 127.0, 116.3, 97.4, 71.3, 69.9, 22.2, 22.1, 22.1, 20.9, 19.5$ ; MS (ESI)  $m/z$  379 ( $\text{M}+\text{Na}^+$ , 100), 357 ( $\text{M}+\text{H}^+$ , 30.5); HRMS (EI,  $\text{M}+\text{H}^+$ ) 357.2423 (Calcd. for  $\text{C}_{23}\text{H}_{33}\text{O}_3$  357.2424).

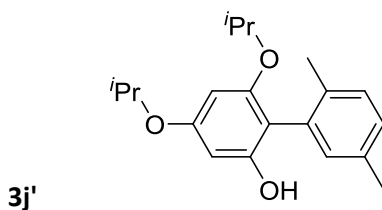

2,4,6-diisopropoxy-2',5'-dimethyl-1,1'-biphen-2-ol, 3j', \* - from the same reaction mixture as described above, the dealkylated product **3j'** was isolated during column chromatography as a pale oil (9.6 mg, 31  $\mu\text{mol}$ , 12% yield).  $^1\text{H}$  NMR (400 MHz,  $\text{CDCl}_3$ )  $\delta = 7.19$  (d,  $J = 7.7$ , 1H), 7.09 (dd,  $J = 7.7, 1.5$ , 1H), 6.99 (d,  $J = 1.5$ , 1H), 6.19 (d,  $J = 2.2$ , 1H), 6.12 (d,  $J = 2.2$ , 1H), 4.76 (br s, 1H), 4.53 (sept,  $J = 6.0$ , 1H), 4.33 (sept,  $J = 6.0$ , 1H), 2.33 (s, 3H), 2.08 (s, 3H), 1.36 (d,  $J = 6.0$ , 6H), 1.16 (d,  $J = 6.0$ , 3H), 1.12 (d,  $J = 6.0$ , 3H);  $^{13}\text{C}$  NMR (101 MHz,  $\text{CDCl}_3$ )  $\delta = 158.8, 156.6, 154.2, 135.9, 135.6, 131.9, 131.7, 130.3, 128.8, 110.6, 95.7, 94.2, 70.6, 69.8, 22.2, 22.1, 22.1, 22.0, 20.9, 19.2$ ; MS (EI)  $m/z = 315$  ( $\text{M}+\text{H}^+$ , 100); HRMS (EI,  $\text{M}+\text{H}^+$ ) 315.1954 (Calcd. for  $\text{C}_{20}\text{H}_{27}\text{O}_3$  315.1955).

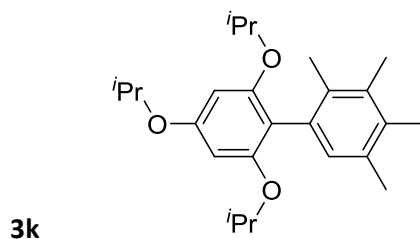

2,4,6-tri-isopropoxy-2',3',4',5'-dimethyl-1,1'-biphenyl, 3k, To a 10 ml microwave vial or round bottomed flask equipped with a magnetic stirrer bar was added palladium(II) acetate (5.6 mg, 25  $\mu\text{mol}$ , 10 mol%), 1,3,5-triisopropoxy-benzene (63.1 mg, 0.25 mmol, 1.0 equiv), potassium peroxodisulfate (203 mg, 0.75 mmol, 3.0 equiv) and prehenitene (931  $\mu\text{L}$ , 6.25 mmol). The reaction vessel was then briefly flushed with  $\text{N}_2$  and trifluoroacetic acid (191  $\mu\text{L}$ , 2.5 mmol, 10 equiv) was then added under  $\text{N}_2$  flow and sealed. The reaction mixture was then heated with stirring to 50  $^\circ\text{C}$  in an oil bath for 18 hours. After the allotted reaction time, the reaction was allowed to cool to room temperature, diluted with dichloromethane (10 mL), filtered through cotton wool and adsorbed onto silica gel *in vacuo*. The sample was then dry loaded onto a silica gel column and purified eluting with hexane/ethyl acetate (100:0 to 95:5). The fractions containing the arylated product were then concentrated *in vacuo* to yield a crude sample which was further purified by preparative thin layer chromatography; the title compound was isolated as a colourless oil (38.6 mg,  $^1\text{H}$  NMR analysis revealed that the product was a mixture of 11:1 **3m**:residual starting material: product = 102  $\mu\text{mol}$ , 41% yield).  $^1\text{H}$  NMR (400 MHz,  $\text{CDCl}_3$ )  $\delta = 6.81$  (s, 1H), 6.22 (s, 2H), 4.55 (sept,  $J = 6.0$ , 1H), 4.19 (sept,  $J = 6.0$ , 2H), 2.26 (s, 3H), 2.23 (s, 3H), 2.23 (s, 3H), 2.01 (s, 3H), 1.38 (d,  $J = 6.0$ , 6H), 1.11 (d,  $J = 6.0$ , 6H), 1.11 (d,  $J = 6.0$ , 6H);  $^{13}\text{C}$  NMR (101 MHz,  $\text{CDCl}_3$ )  $\delta = 157.7, 157.1, 133.8, 133.2, 132.4, 131.9, 131.4, 130.4, 117.0$ ,

97.3, 71.2, 69.8, 22.2, 22.1, 20.6, 17.7, 16.4, 16.0.; MS (ESI)  $m/z$  = 407 ( $M+Na^+$ , 100), 385 ( $M+H^+$ , 41.5); HRMS (ESI,  $M+H^+$ ) 385.2726 (Calcd. for  $C_{25}H_{37}O_3$  385.2737).

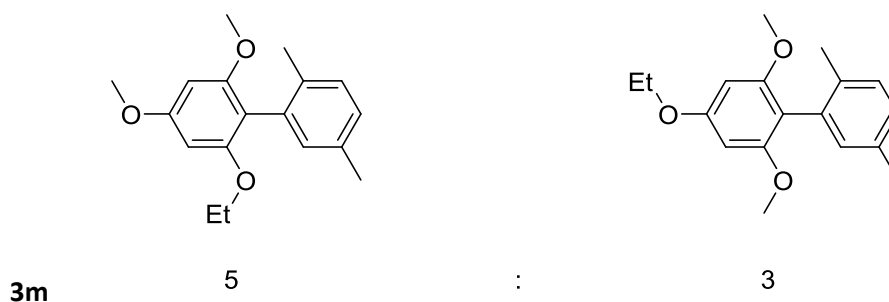

2-ethoxy-4,6-dimethoxy-2',5'-dimethyl-1,1'-biphenyl (A), 4-ethoxy-2,6-dimethoxy-2',5'-dimethyl-1,1'-biphenyl (B), 3m, was synthesised using the general protocol from *para*-xylene (771  $\mu$ L, 6.25 mmol) and 1-ethoxy-3,5-dimethoxybenzene (45.6 mg, 0.25 mmol); after silica gel column chromatography the compound was further purified by preparative thin layer chromatography, the title compounds were isolated as a colourless oil (31.0 mg, 108  $\mu$ mol, 43% yield;  $^1H$  NMR analysis revealed that the sample was a 5:3 ratio of **A:B** isomers).  $^1H$  NMR (400 MHz,  $CDCl_3$ )  $\delta$  = 7.18-7.13 (m, 1H A + 1H B), 7.08-7.02 (m, 1H A + 1H B), 6.97-6.95 (m, 1H A + 1H B), 6.25-6.22 (m, 2H A + 2H B), 4.11 (q,  $J$  = 7.0, 2H B), 3.96 (app qd,  $J$  = 7.0, 1.7, 2H A), 3.87 (s, 3H A), 3.71 (s, 3H A), 3.71 (6H, B), 2.34 (br s, 3H A + 3H B), 2.06 (s, 3H A), 2.05 (s, 3H B), 1.48 (t,  $J$  = 7.0, 3H B), 1.21 (t,  $J$  = 7.0, 3H A);  $^{13}C$  NMR (101 MHz,  $CDCl_3$ )  $\delta$  = 160.4, 159.9, 158.4, 158.3, 157.6, 134.6, 134.5, 134.3, 134.1, 134.0, 133.9, 132.0, 131.9, 129.3, 129.2, 128.0, 127.7, 112.7, 111.8, 92.1, 91.2, 90.9, 64.2, 63.5, 55.8, 55.8, 55.3, 21.1, 21.1, 19.4, 19.3, 15.0, 14.7; MS (ESI)  $m/z$  = 309 ( $M+Na^+$ , 100), 287 ( $M+H^+$ , 35.4); HRMS (ESI,  $M+H^+$ ) 287.1629 (Calcd. for  $C_{18}H_{23}O_3$  287.1642).

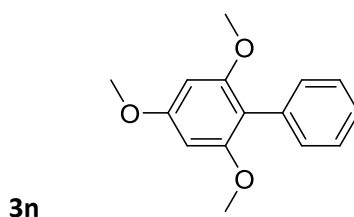

2,4,6-trimethoxy-1,1'-biphenyl,<sup>6</sup> **3n**, To a 10 ml microwave vial or round bottomed flask equipped with a magnetic stirrer bar was palladium(II) trifluoroacetate (8.3 mg, 25  $\mu$ mol, 10 mol%), 1,3,5-trimethoxybenzene (42.0 mg, 0.25 mmol, 1.0 equiv), potassium peroxodisulfate (203 mg, 0.75 mmol, 3.0 equiv) and benzene (1.00 mL, 11.25 mmol, 45 equiv). The reaction vessel was then briefly flushed with  $N_2$  and trifluoroacetic acid (96  $\mu$ L, 1.25 mmol, 5 equiv) was then added under  $N_2$  flow and sealed. The reaction mixture was then heated with stirring to 50  $^{\circ}C$  in an oil bath for 18 hours. After the allotted reaction time the reaction was then allowed to cool to room temperature, diluted with  $CH_2Cl_2$  (10 mL), filtered through cotton wool and adsorbed onto silica gel *in vacuo*. The sample was then dry loaded onto a silica gel column and purified eluting with hexane/ethyl acetate (100:0 to 95:5). The fractions containing the arylated product were then concentrated *in vacuo* to yield the title compound as a white crystalline solid (27.6 mg, 113  $\mu$ mol, 45 % yield). M.p. = 151-153  $^{\circ}C$  (lit. = 152-154  $^{\circ}C$ )<sup>5</sup>;  $^1H$  NMR (400 MHz,  $CDCl_3$ )  $\delta$  = 7.42 – 7.36 (m, 2H), 7.35 – 7.26 (m, 3H), 6.23 (s, 2H), 3.87 (s, 3H), 3.72 (s, 6H);  $^{13}C$  NMR (101 MHz,  $CDCl_3$ )  $\delta$  = 160.5, 158.3, 134.1, 131.2, 127.6,

126.5, 112.4, 90.8, 55.9, 55.4; MS (ESI)  $m/z$  = 267 ( $M+Na^+$ , 100), 245 ( $M+H^+$ , 32.9); HRMS (ESI,  $M+H^+$ ) 245.1167 (Calcd. for  $C_{15}H_{17}O_3$  245.1172).

Additional CDC products not in Scheme 2 of paper (**3o**, **3p**, and **3q**).

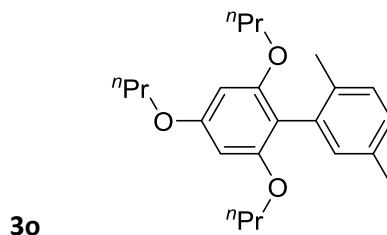

2,4,6-tri-*n*-propoxy-2',5'-dimethyl-1,1'-biphenyl, **3o**, was synthesised using the general protocol from *para*-xylene (771  $\mu$ l, 6.25 mmol) and 1,3,5-tri-*n*-propoxy-benzene (63.1 mg, 0.25 mmol); the title compound was isolated as a clear oil (Run 1 = 41.8 mg,  $^1H$  NMR analysis of the product sample, post preparative thin layer chromatography, showed that it was a 11:9 mixture of **3o**:residual starting material; 72  $\mu$ mol, 29 % yield; Run 2 = 40.0 mg,  $^1H$  NMR analysis of the product sample, post preparative thin layer chromatography, showed that it was a 3:2 mixture of **3o**:residual starting material; 74  $\mu$ mol, 30% yield; average = 29% yield).  $^1H$  NMR (500 MHz,  $CDCl_3$ )  $\delta$  = 7.10 (d,  $J$  = 7.7, 1H), 7.00 (dd,  $J$  = 7.7, 1.6, 1H), 6.94 (d,  $J$  = 1.6, 1H), 6.21 (s, 2H), 3.96 (t,  $J$  = 6.5, 2H), 3.82 (app td,  $J$  = 6.5, 1.0, 4H), 2.30 (s, 3H), 2.04 (s, 3H), 1.85 (sext,  $J$  = 7.0, 2H), 1.59 (sext,  $J$  = 7.0, 4H), 1.08 (t,  $J$  = 7.0, 3H), 0.81 (t,  $J$  = 7.0, 6H);  $^{13}C$  NMR (126 MHz,  $CDCl_3$ )  $\delta$  = 159.7, 157.7, 134.4, 134.1, 133.7, 132.1, 128.8, 127.2, 113.1, 92.6, 70.1, 22.7, 22.5, 20.9, 19.4, 10.6, 10.4 (17 out of a possible 18 carbon resonances observed, it is likely the remaining O-CH<sub>2</sub>- signal lies at 69.6 ppm under the residual starting material peak); MS (ESI)  $m/z$  = 379 ( $M+Na^+$ , 100), 357 ( $M+H^+$ , 37.3); HRMS (ESI,  $M+H^+$ ) 357.2411 (Calcd. for  $C_{23}H_{33}O_3$  357.2424).

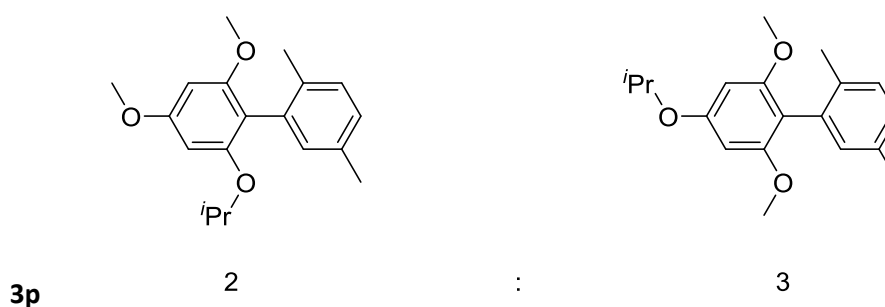

2-isopropoxy-4,6-dimethoxy-2',5'-dimethyl-1,1'-biphenyl (**A**), 4-isopropoxy-2,6-dimethoxy-2',5'-dimethyl-1,1'-biphenyl (**B**), **3p**, was synthesised using the general protocol from *para*-xylene (771  $\mu$ l, 6.25 mmol) and 1-isopropoxy-3,5-dimethoxy-benzene (42.0 mg, 0.25 mmol); after silica gel column chromatography the compound was further purified by preparative thin layer chromatography, the title compounds were isolated as a yellow oil (18.4 mg, 61  $\mu$ mol, 25% yield;  $^1H$  NMR analysis revealed that the sample was a 2:3 ratio of **A**:**B** isomers).  $^1H$  NMR (400 MHz,  $CDCl_3$ )  $\delta$  = 7.15 (d,  $J$  = 7.7, 1H B), 7.12 (d,  $J$  = 7.7, 1H A), 7.07–7.00 (m, 1H A + 1H B), 6.96 (br s, 1H B), 6.94 (br s, 1H A), 6.25–6.20 (m, 2H A + 2H B), 4.61 (sept,  $J$  = 6.0, 1H B), 4.23 (sept,  $J$  = 6.0, 1H A), 3.85 (s, 3H A), 3.70 (s, 3H A), 3.69 (6H, B), 2.33 (s, 3H B), 2.32 (s, 3H A), 2.05 (s, 3H A), 2.04 (s, 3H B), 1.40 (d,  $J$  = 6.0, 6H B), 1.11 (d,  $J$  = 6.0, 3H A), 1.11 (d,  $J$  = 6.0, 3H A);  $^{13}C$  NMR (101 MHz,  $CDCl_3$ )  $\delta$  = 160.1, 158.7, 158.5, 158.3, 156.9, 134.6, 134.5, 134.3, 134.1, 134.0, 133.9,



132.0, 131.9, 129.3, 129.1, 127.9, 127.5, 114.2, 111.8, 94.7, 92.5, 91.4, 71.5, 70.0, 55.8, 55.7, 55.3, 22.2, 22.1, 22.0, 21.1, 21.0, 19.3, 19.3; MS (ESI)  $m/z$  = 323 ( $M+Na^+$ , 100), 301 ( $M+H^+$ , 22.0); HRMS (ESI,  $M+H^+$ ) 323.1606 (Calcd. for  $C_{20}H_{26}O_3Na$  323.1618).

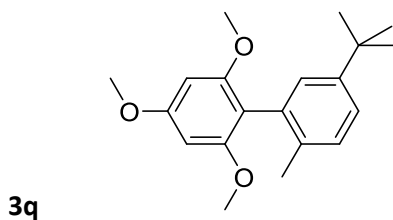

2,4,6-trimethoxy-2'-methyl-4'-tert-butyl-1,1'-biphenyl, **3q**, was synthesised using the general protocol from 4-*tert*-butyltoluene (1.08 mL, 6.25 mmol) and 1,3,5-trimethoxybenzene (42.0 mg, 0.25 mmol); the title compound was isolated as a yellow oil (Run 1 = 9.3 mg, 29.6  $\mu$ mol, 12 % yield; Run 2 = 9.2 mg, 29.3  $\mu$ mol, 12% yield; average = 12% yield).  $^1H$  NMR (500 MHz,  $CDCl_3$ )  $\delta$  = 7.26 (dd,  $J$  = 8.0, 2.1, 1H), 7.19 (d,  $J$  = 8.0, 1H), 7.16 (d,  $J$  = 2.1, 1H), 6.24 (s, 2H), 3.88 (s, 3H), 3.70 (s, 6H), 2.06 (s, 3H), 1.32 (s, 9H);  $^{13}C$  NMR (126 MHz,  $CDCl_3$ )  $\delta$  = 160.5, 158.4, 147.4, 134.7, 133.4, 129.0, 128.8, 123.9, 112.4, 90.8, 55.8, 55.4, 34.3, 31.4, 19.2; MS (ESI)  $m/z$  = 337 ( $M+Na^+$ , 100), 315 ( $M+H^+$ , 44.0); HRMS (ESI,  $M+H^+$ ) 315.1938 (Calcd. for  $C_{20}H_{27}O_3$  315.1955).

# 4 NMR Spectra for Compounds **3a-q**

## 2,4,6-trimethoxy-2',5'-dimethyl-1,1'-biphenyl, **3a**

$^1\text{H}$  NMR (300 MHz,  $\text{CDCl}_3$ )

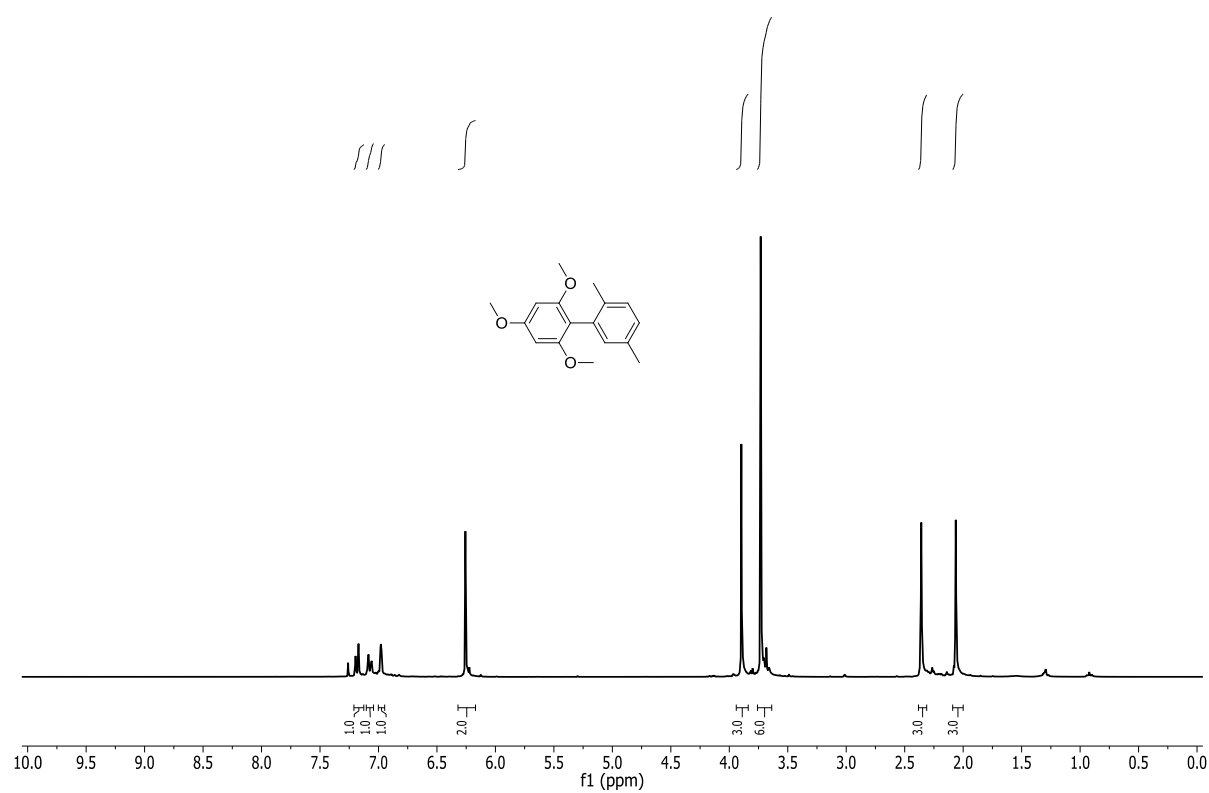

$^{13}\text{C}$  NMR (75 MHz,  $\text{CDCl}_3$ )

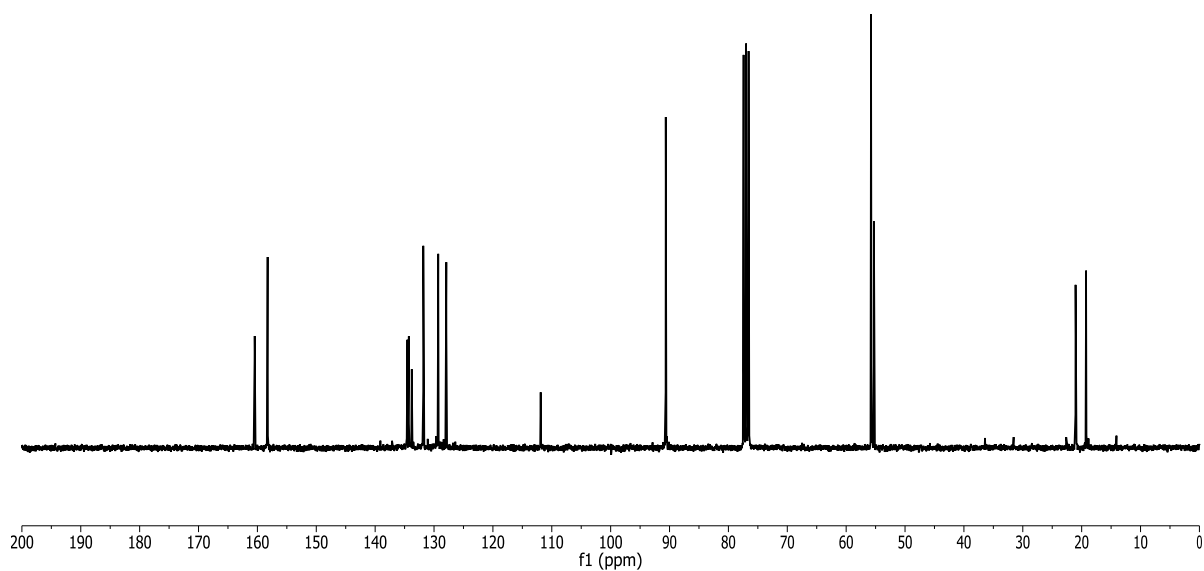

2,4,6-trimethoxy-2',4'-dimethyl-1,1'-biphenyl, and 2,4,6-trimethoxy-3',5'-dimethyl-1,1'-biphenyl, **3b**

$^1\text{H}$  NMR (400 MHz,  $\text{CDCl}_3$ )

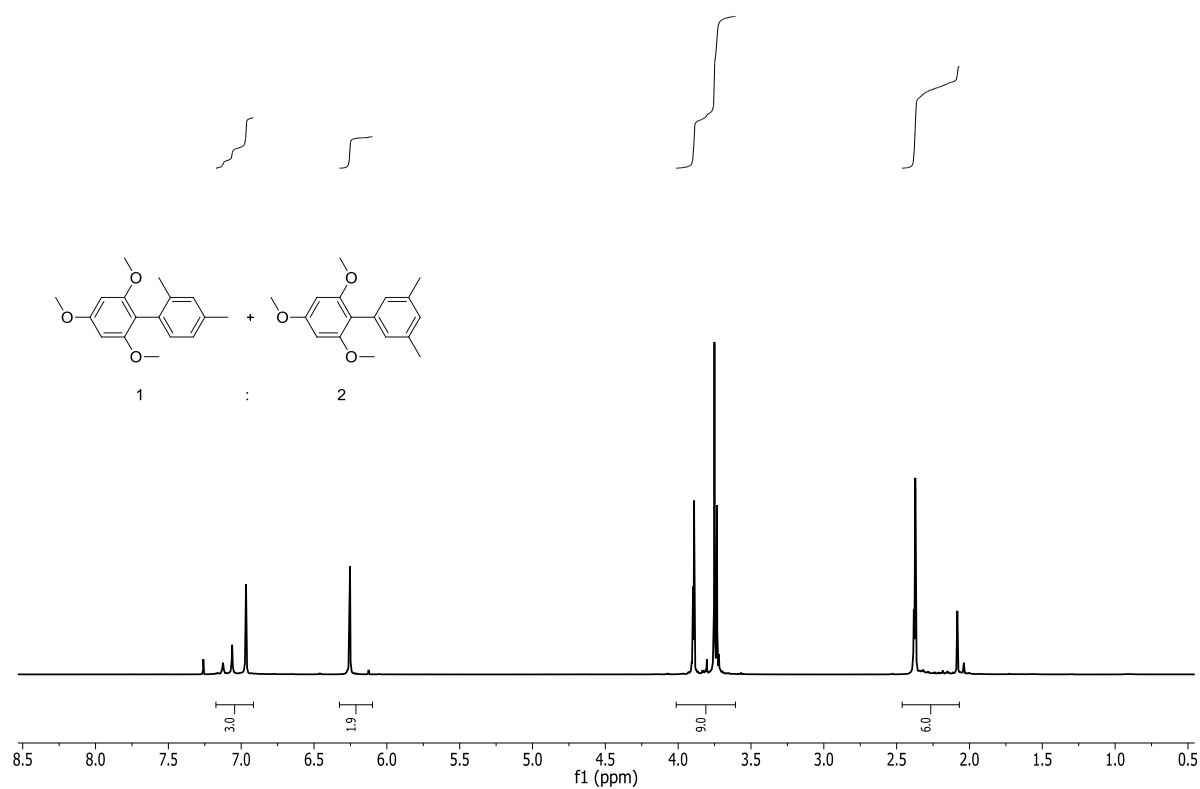

$^{13}\text{C}$  NMR (101 MHz,  $\text{CDCl}_3$ )

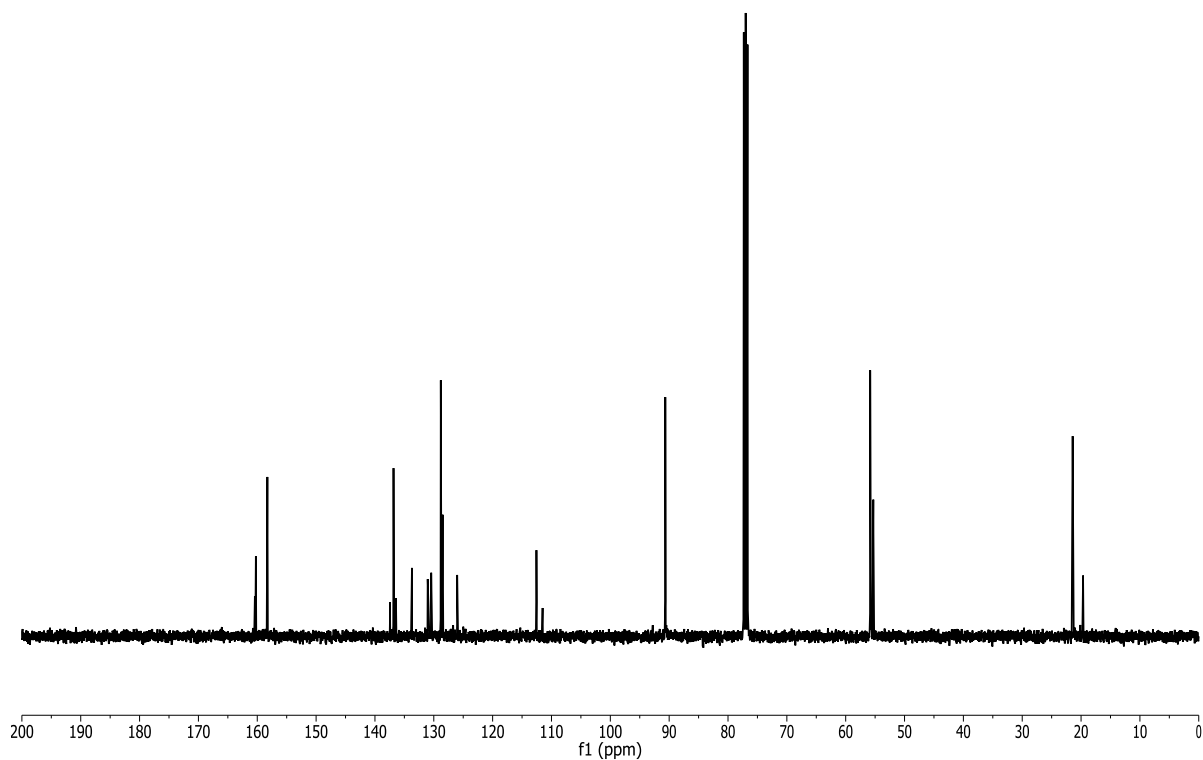

2,4,6-trimethoxy-2',3'-dimethyl-1,1'-biphenyl, 2,4,6-trimethoxy-3',4'-dimethyl-1,1'-biphenyl, **3c**

$^1\text{H}$  NMR (400 MHz,  $\text{CDCl}_3$ )

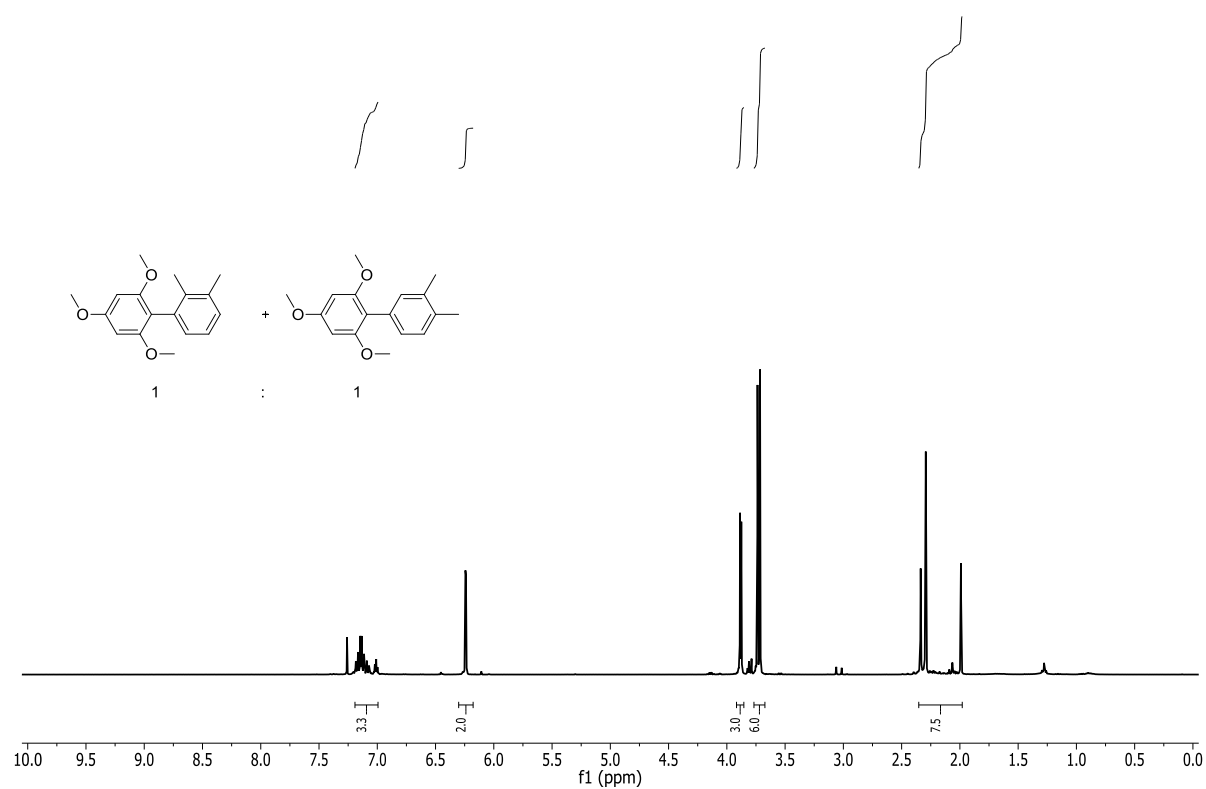

$^{13}\text{C}$  NMR (101 MHz,  $\text{CDCl}_3$ )

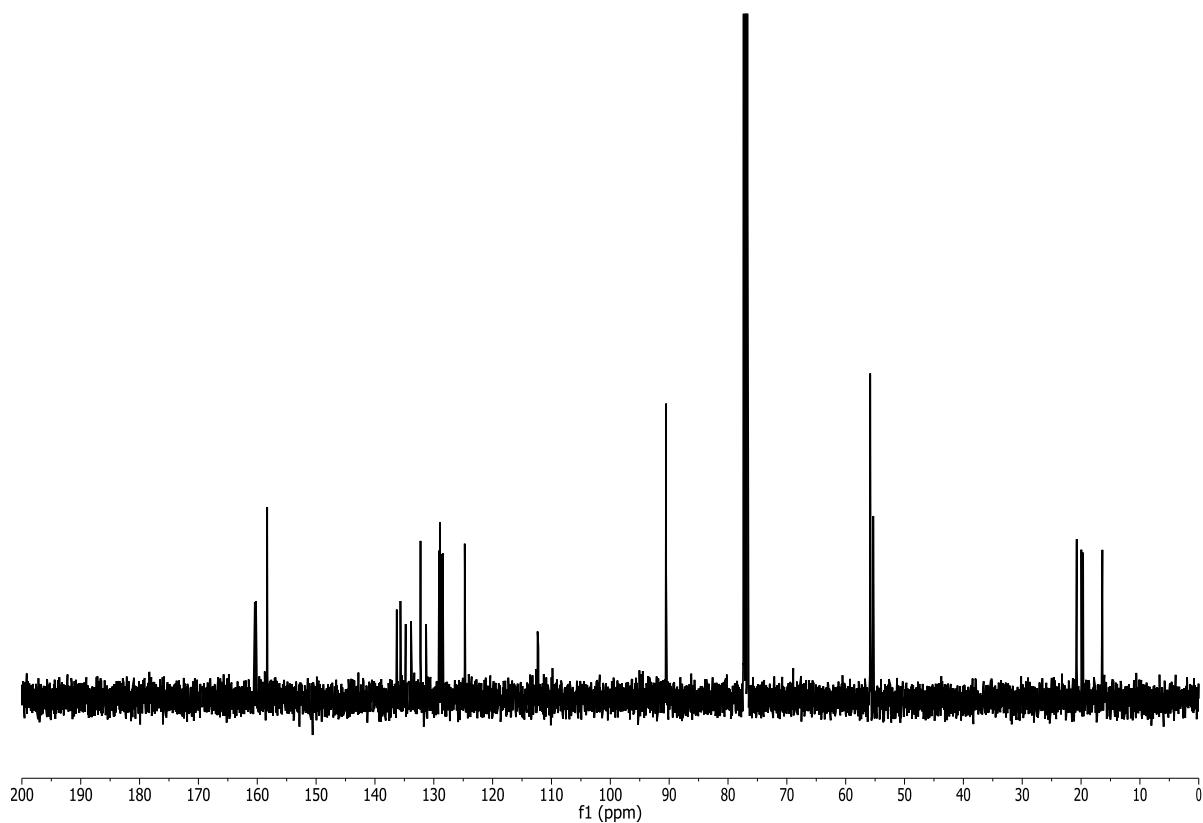

2,4,6-trimethoxy-2',4',6'-trimethyl-1,1'-biphenyl, 3d

$^1\text{H}$  NMR (500 MHz,  $\text{CDCl}_3$ )

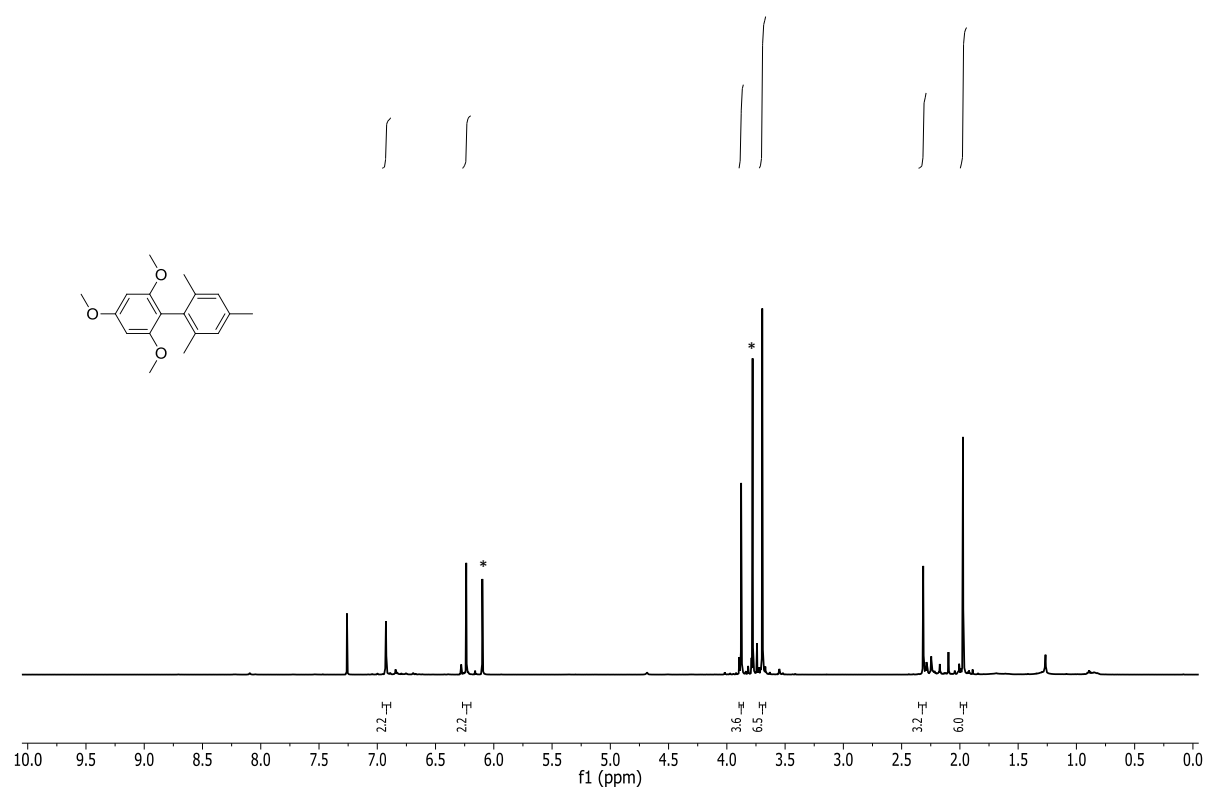

$^{13}\text{C}$  NMR (101 MHz,  $\text{CDCl}_3$ )

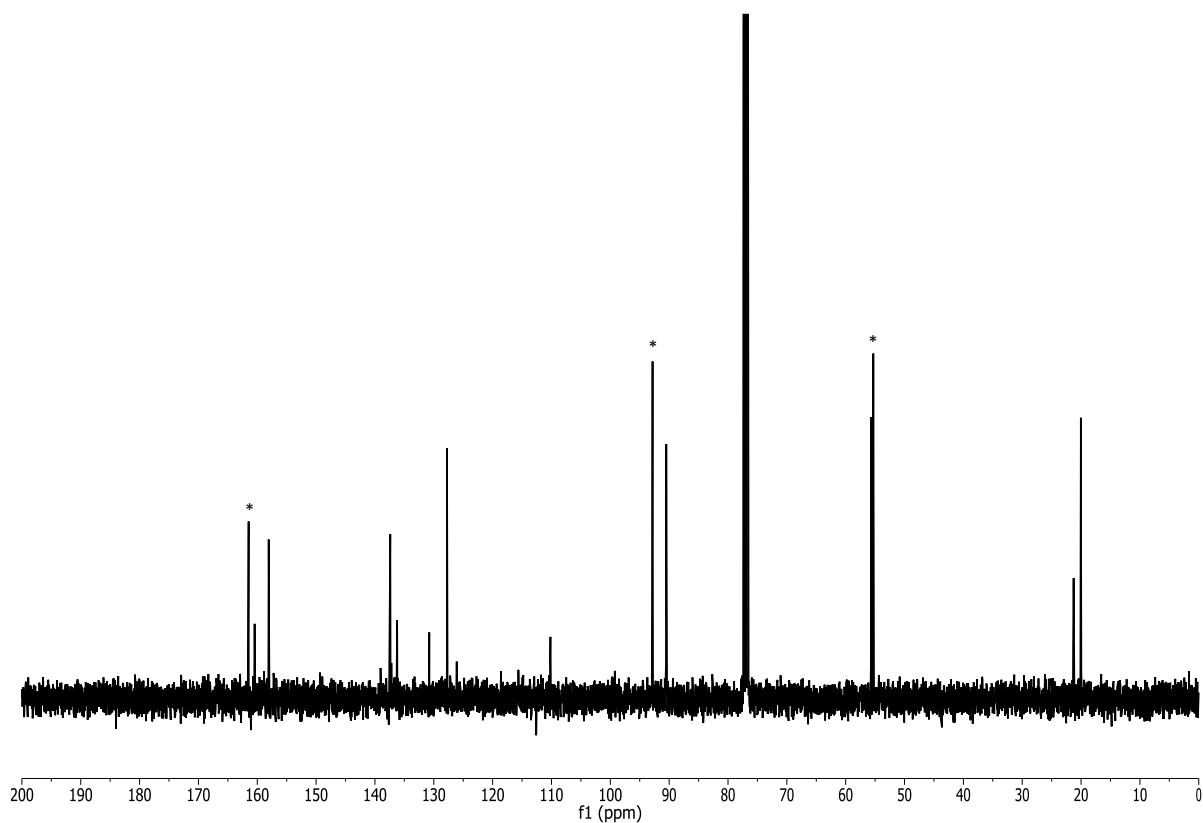

\* - Residual 1,3,5-trimethoxybenzene starting material present in the  $^1\text{H}$  NMR at 6.08, and 3.75 ppm and  $^{13}\text{C}$  NMR at 161.7, 93.0 and 55.2 ppm.

2,4,6-trimethoxy-2',3',6'-trimethyl-1,1'-biphenyl, 2,4,6-trimethoxy-2',3',5'-dimethyl-1,1'-biphenyl, 2,4,6-trimethoxy-2',4',5'-dimethyl-1,1'-biphenyl, **3e**

$^1\text{H}$  NMR (400 MHz,  $\text{CDCl}_3$ )

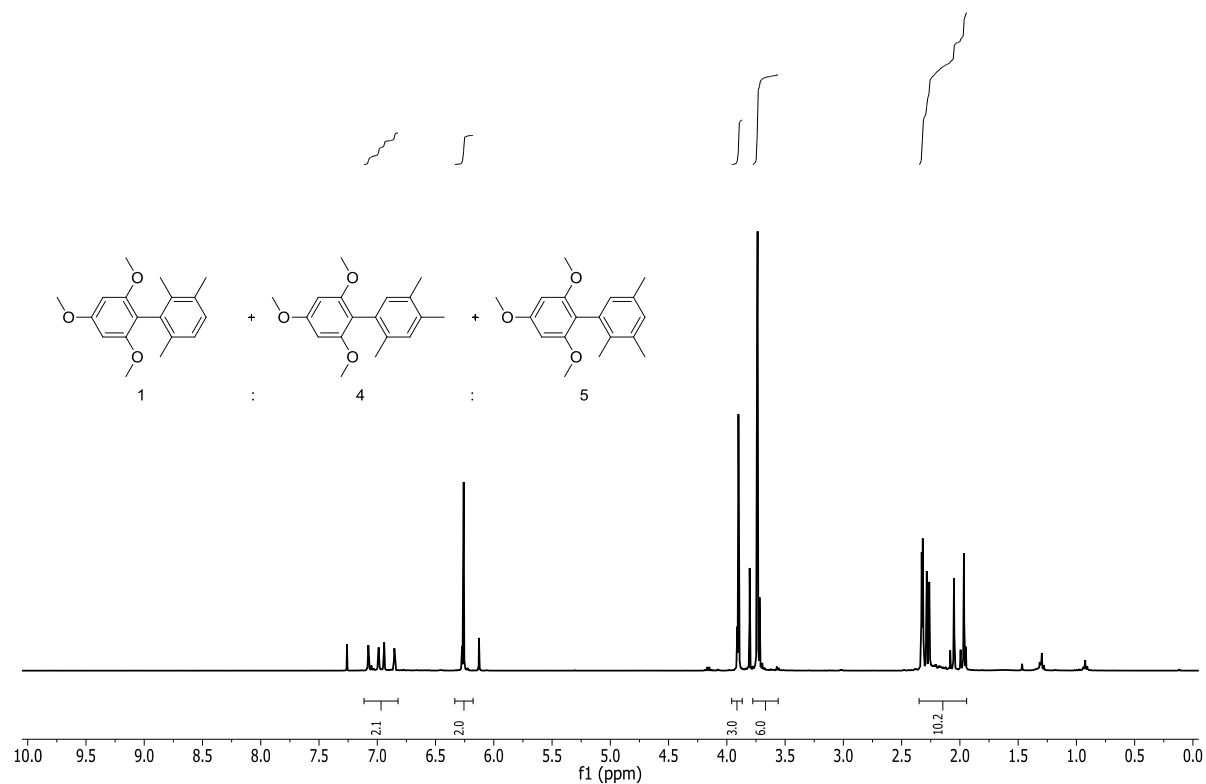

$^{13}\text{C}$  NMR (101 MHz,  $\text{CDCl}_3$ )

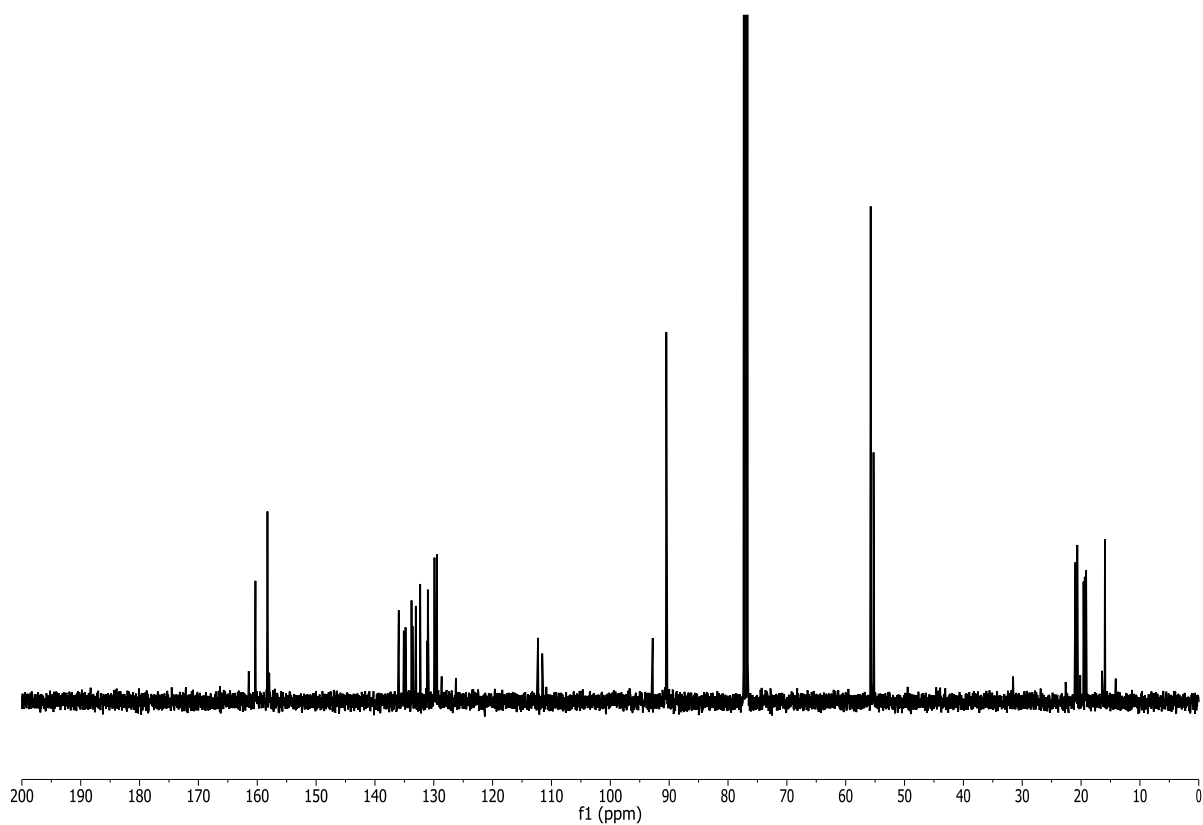

2,4,6-trimethoxy-2',3',4',5'-tetramethyl-1,1'-biphenyl, **3f**

$^1\text{H}$  NMR (400 MHz,  $\text{CDCl}_3$ )

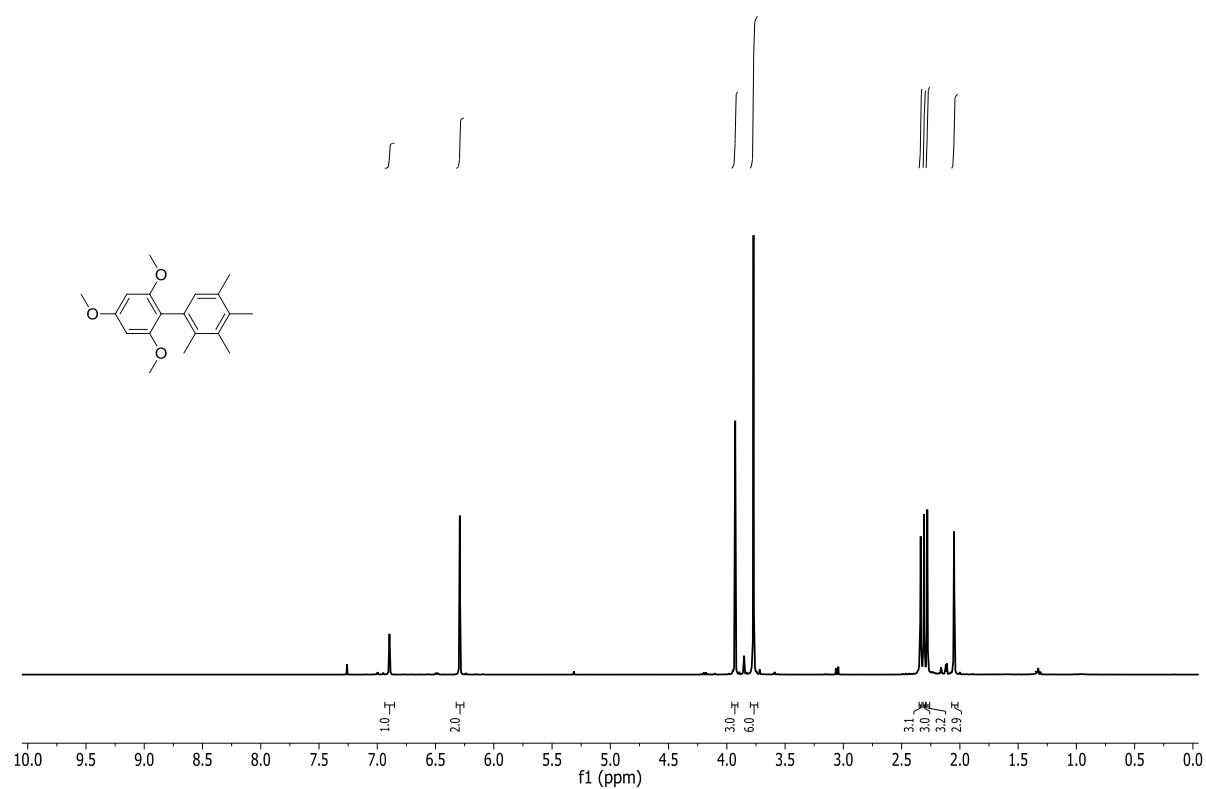

$^{13}\text{C}$  NMR (101 MHz,  $\text{CDCl}_3$ )

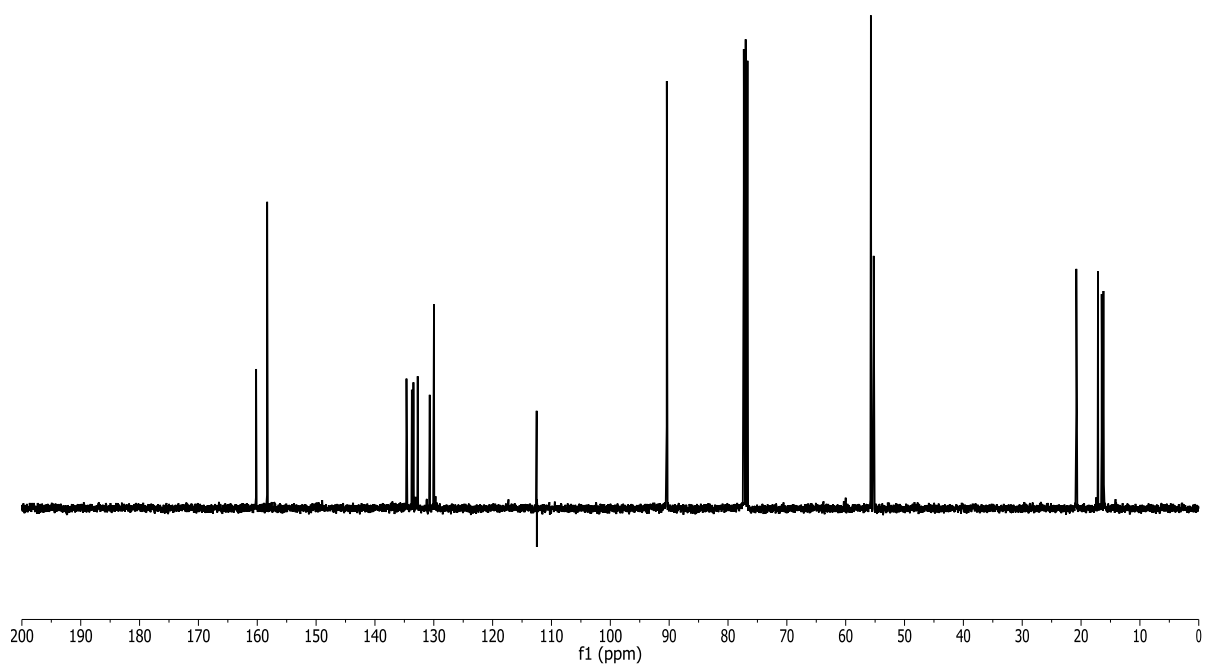

2,4,6-trimethoxy-2',-methyl-4'-*tert*-butyl-1,1'-biphenyl, **3g**

$^1\text{H}$  NMR (400 MHz,  $\text{CDCl}_3$ )

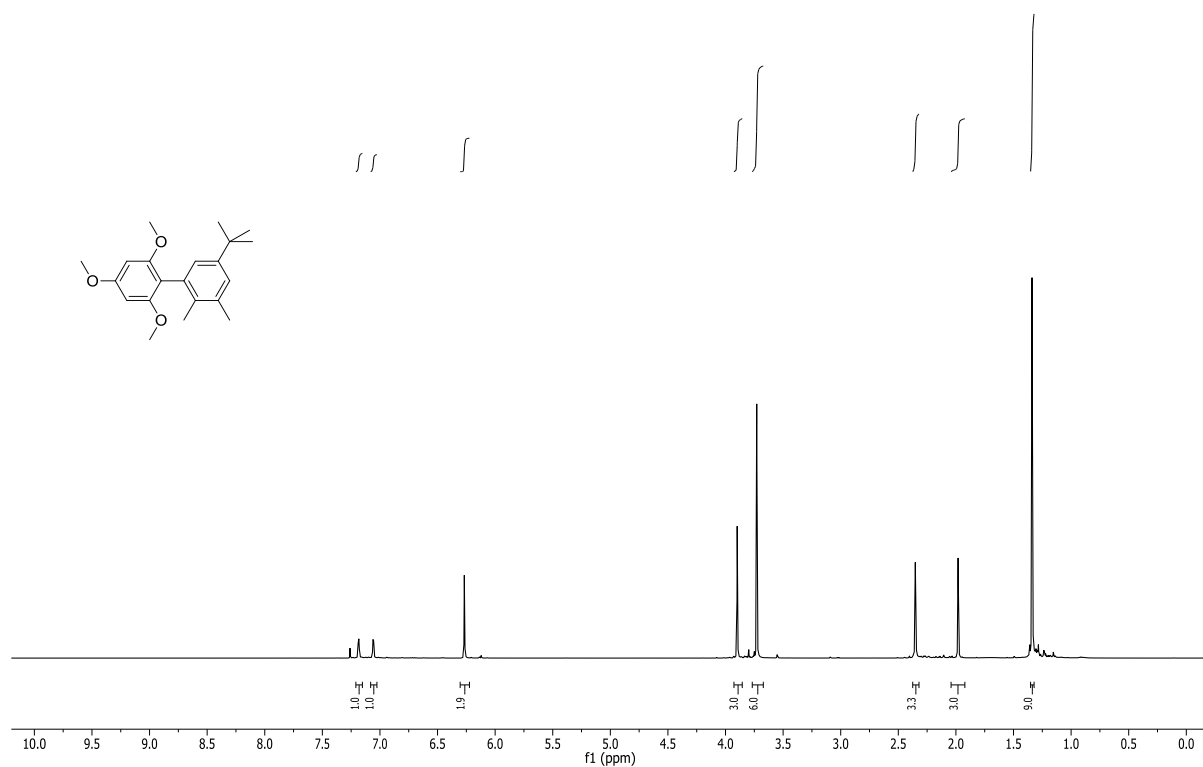

$^{13}\text{C}$  NMR (101 MHz,  $\text{CDCl}_3$ )

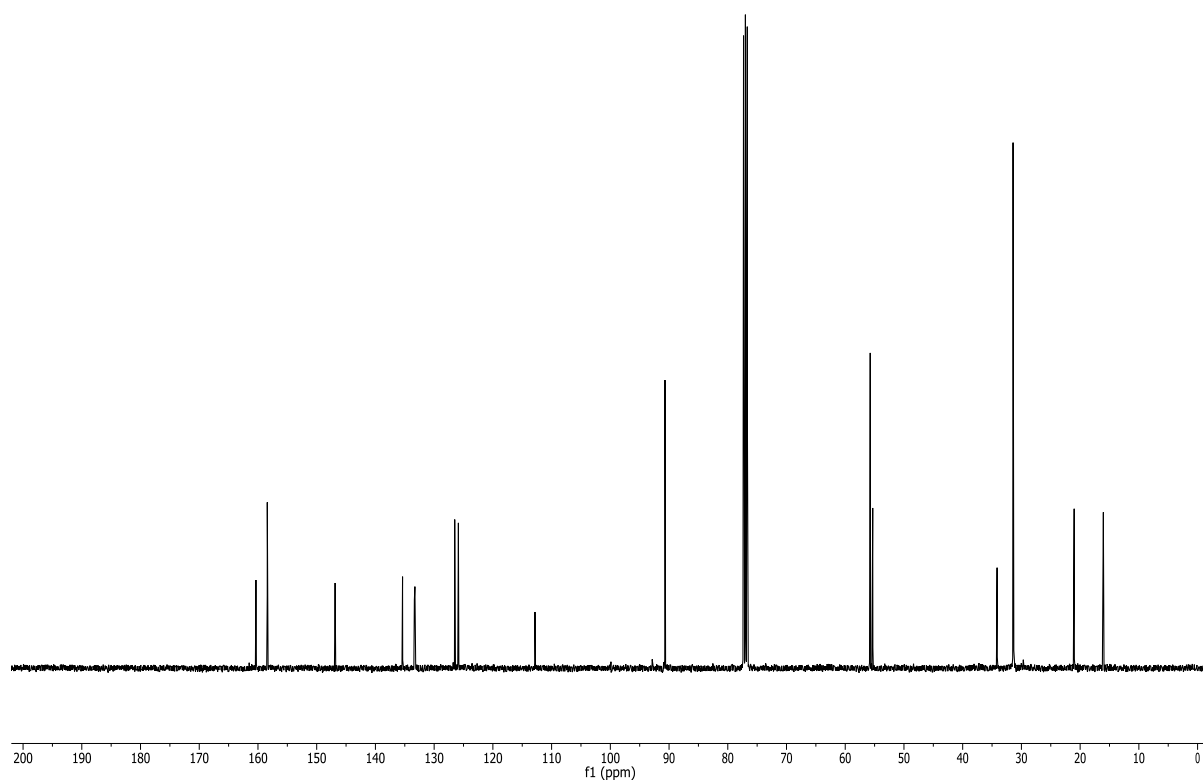



2,4,6-tris(methoxy- $d_3$ )-2',5'-dimethyl-1,1'-biphenyl, **3h**

$^1\text{H}$  NMR (500 MHz,  $\text{CDCl}_3$ )

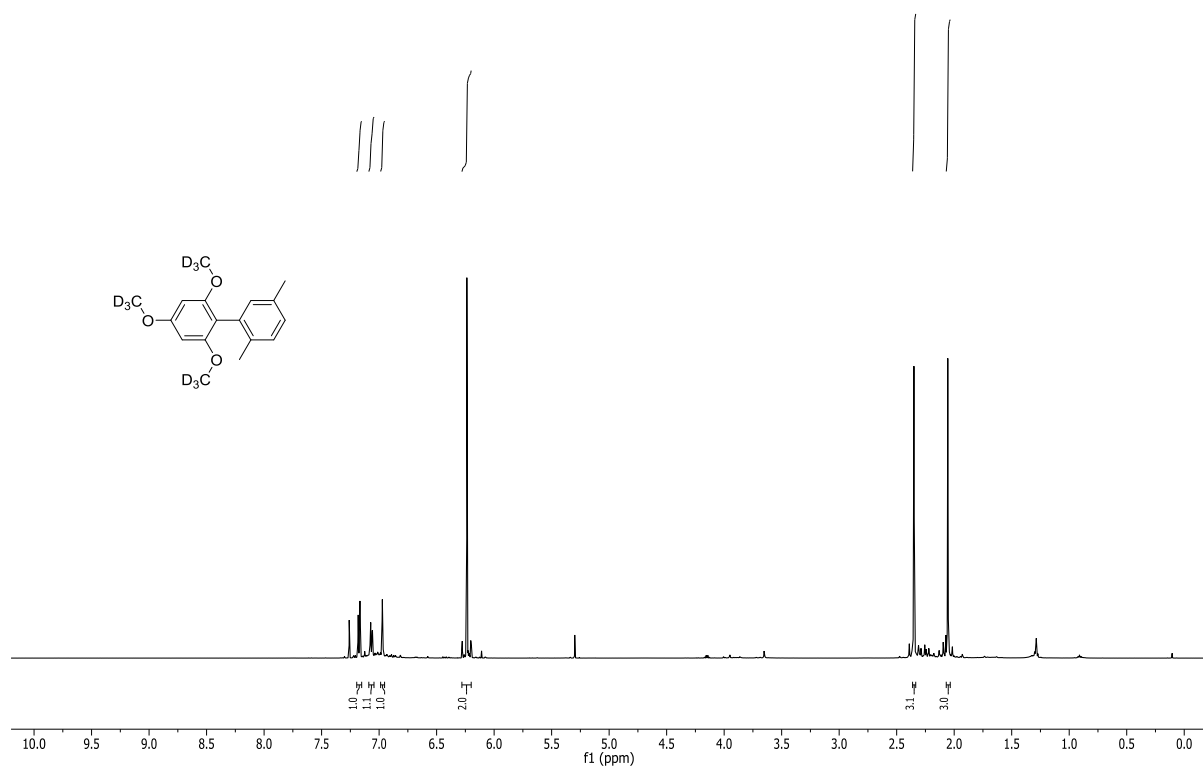

$^{13}\text{C}$  NMR (126 MHz,  $\text{CDCl}_3$ )

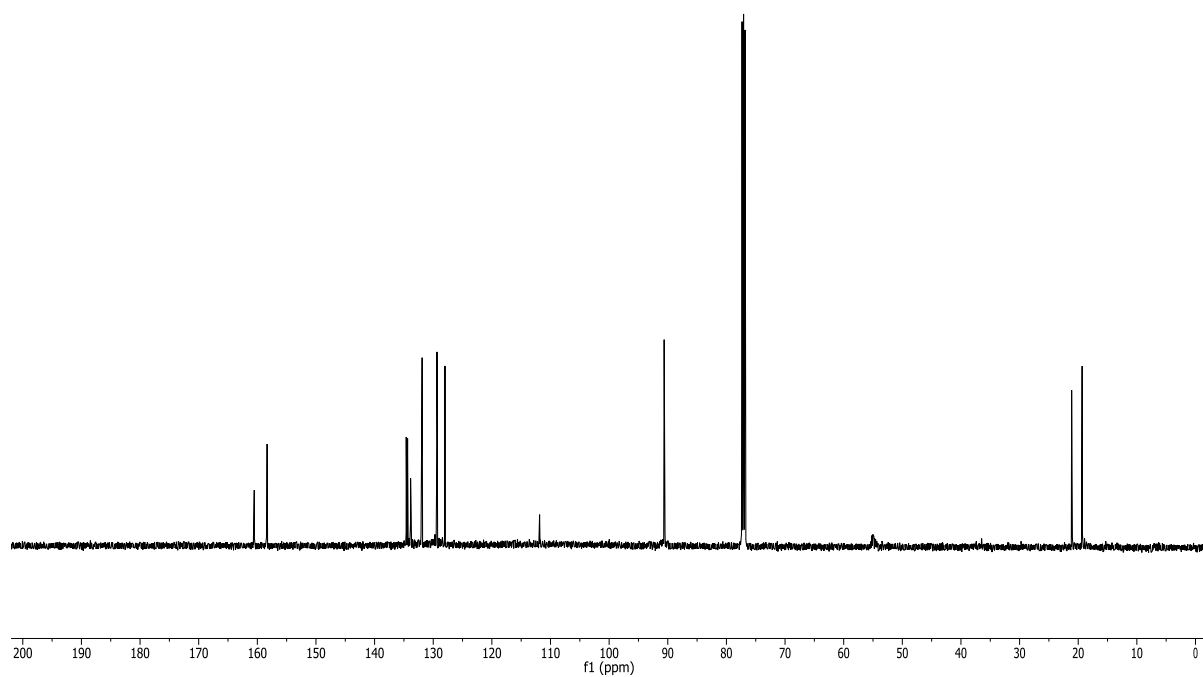

2,4,6-triethoxy-2',5'-dimethyl-1,1'-biphenyl, 3i

$^1\text{H}$  NMR (500 MHz,  $\text{CDCl}_3$ )

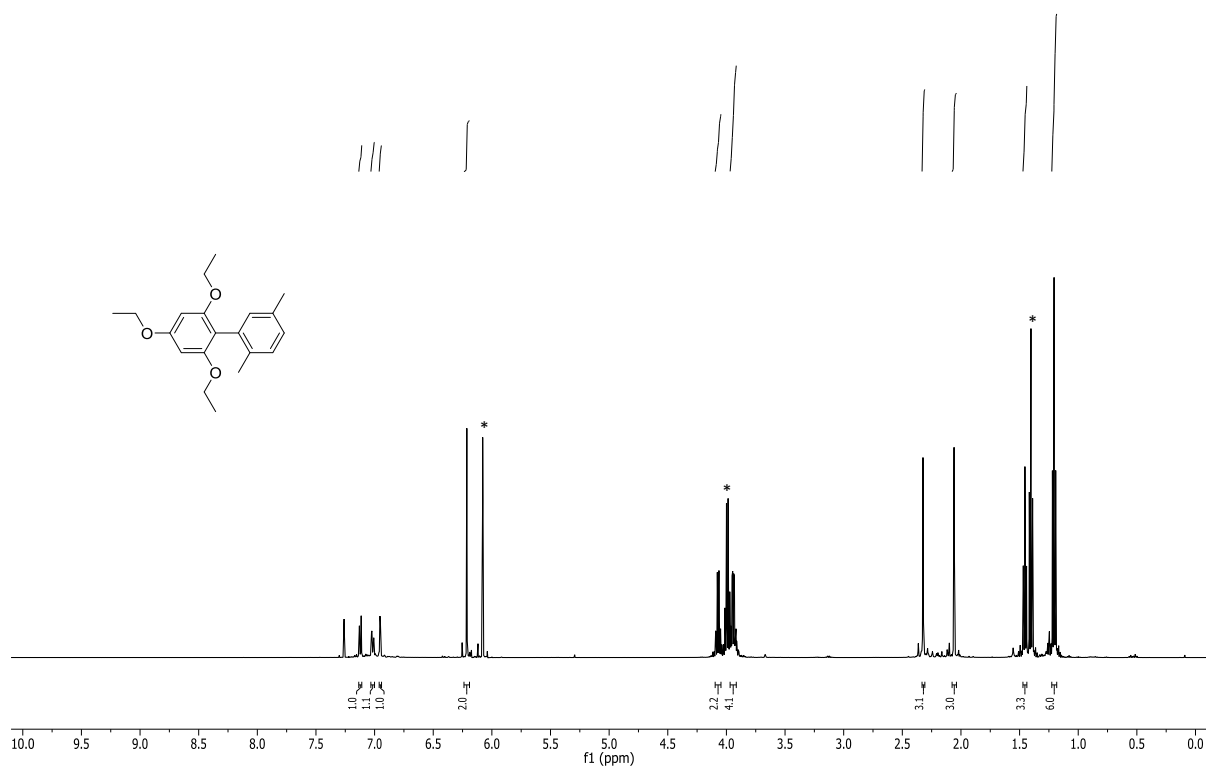

$^{13}\text{C}$  NMR (126 MHz,  $\text{CDCl}_3$ )

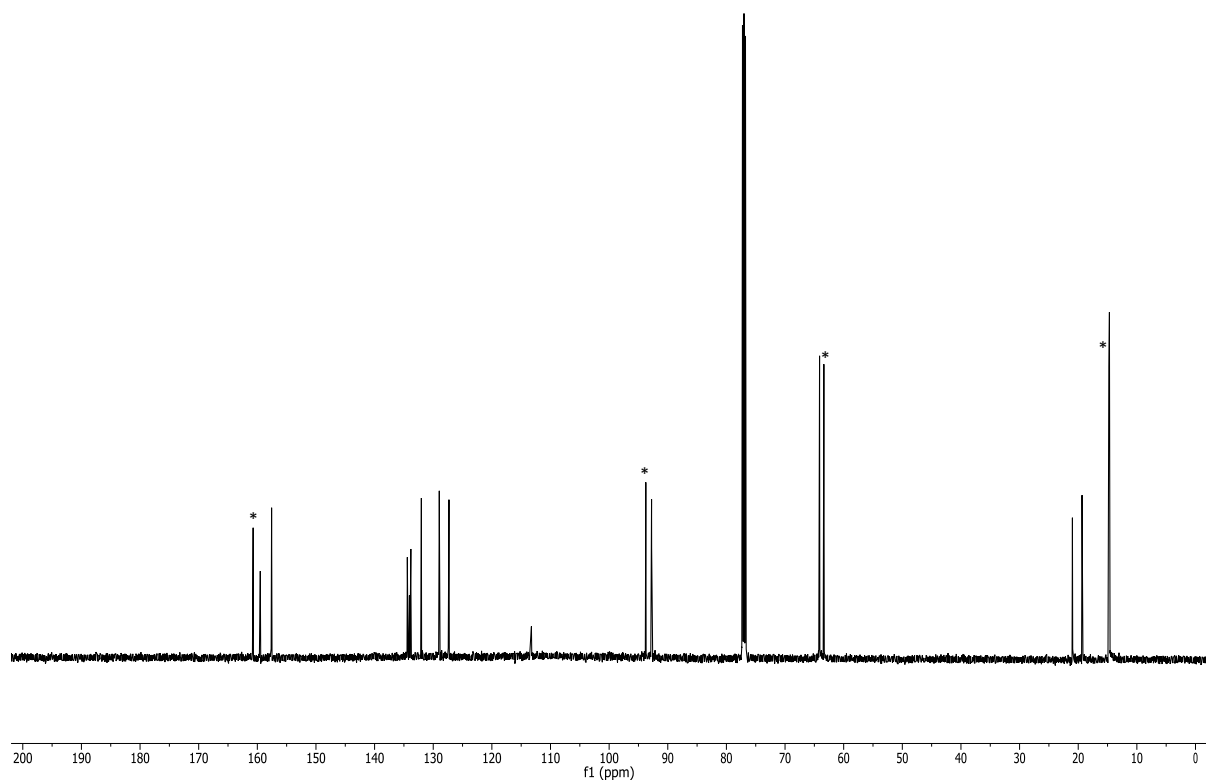

\* - Residual 1,3,5-triethoxybenzene starting material present in the  $^1\text{H}$  NMR at 6.08, 3.99 and 1.40 ppm and  $^{13}\text{C}$  NMR at 160.7, 93.8, 63.4 and 14.8 ppm.

2,4,6-triisopropoxy-2',5'-dimethyl-1,1'-biphenyl, **3j**

$^1\text{H}$  NMR (400 MHz,  $\text{CDCl}_3$ )

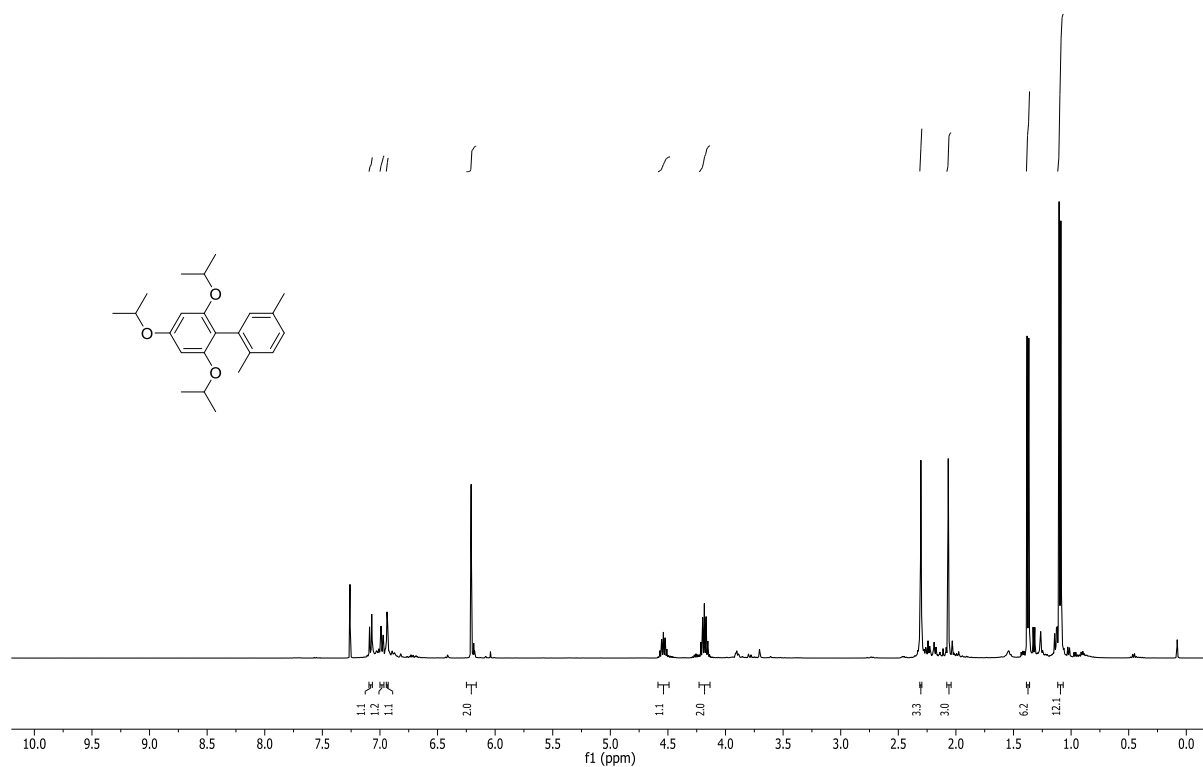

$^{13}\text{C}$  NMR (101 MHz,  $\text{CDCl}_3$ )

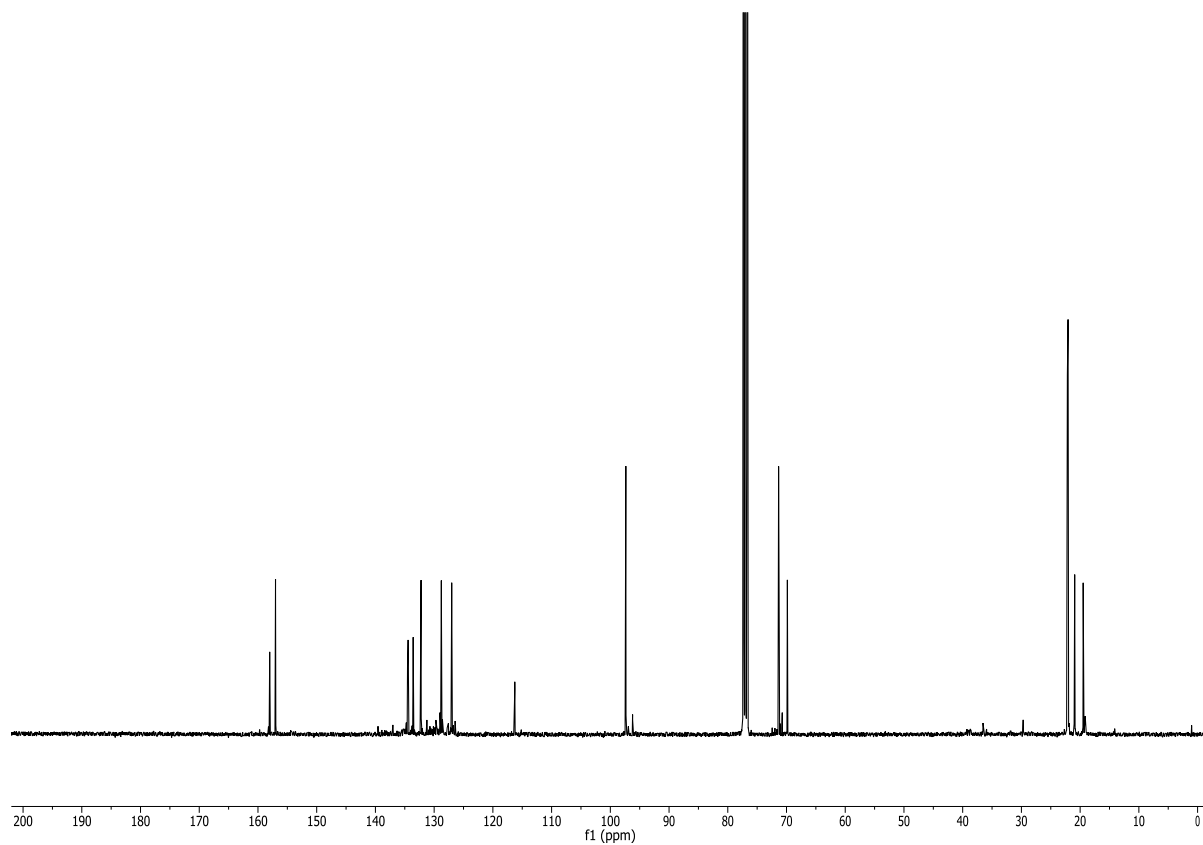

2,4,6-diisopropoxy-2',5'-dimethyl-1,1'-biphen-2-ol, 3j'

$^1\text{H}$  NMR (400 MHz,  $\text{CDCl}_3$ )

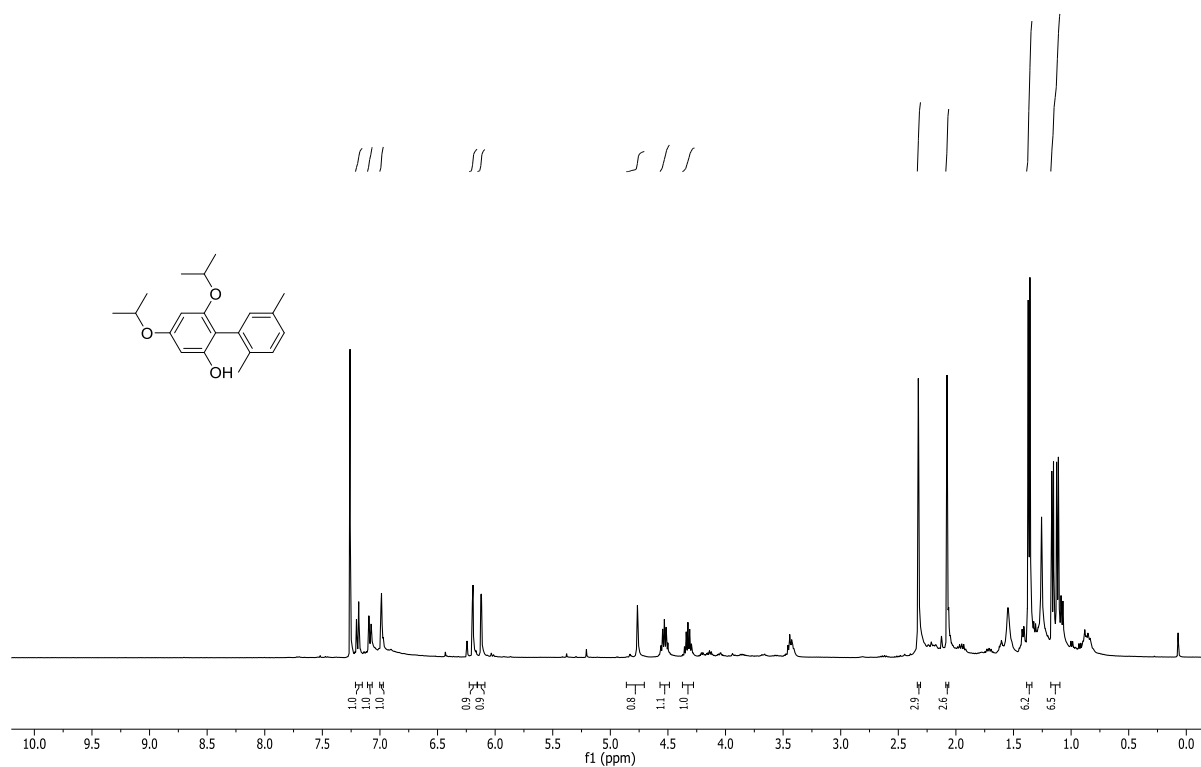

$^{13}\text{C}$  NMR (101 MHz,  $\text{CDCl}_3$ )

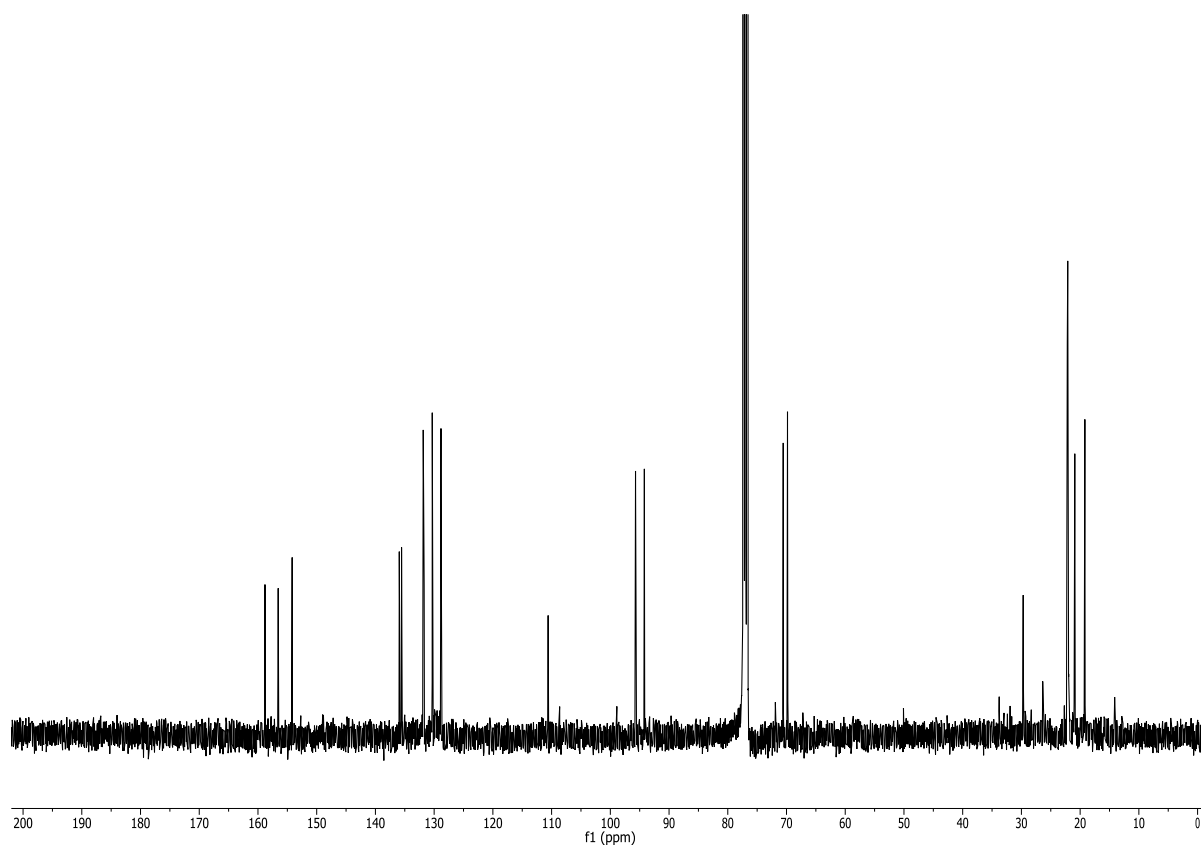

2,4,6-triisopropoxy-2',3',4',5'-dimethyl-1,1'-biphenyl, **3k**

$^1\text{H}$  NMR (400 MHz,  $\text{CDCl}_3$ )

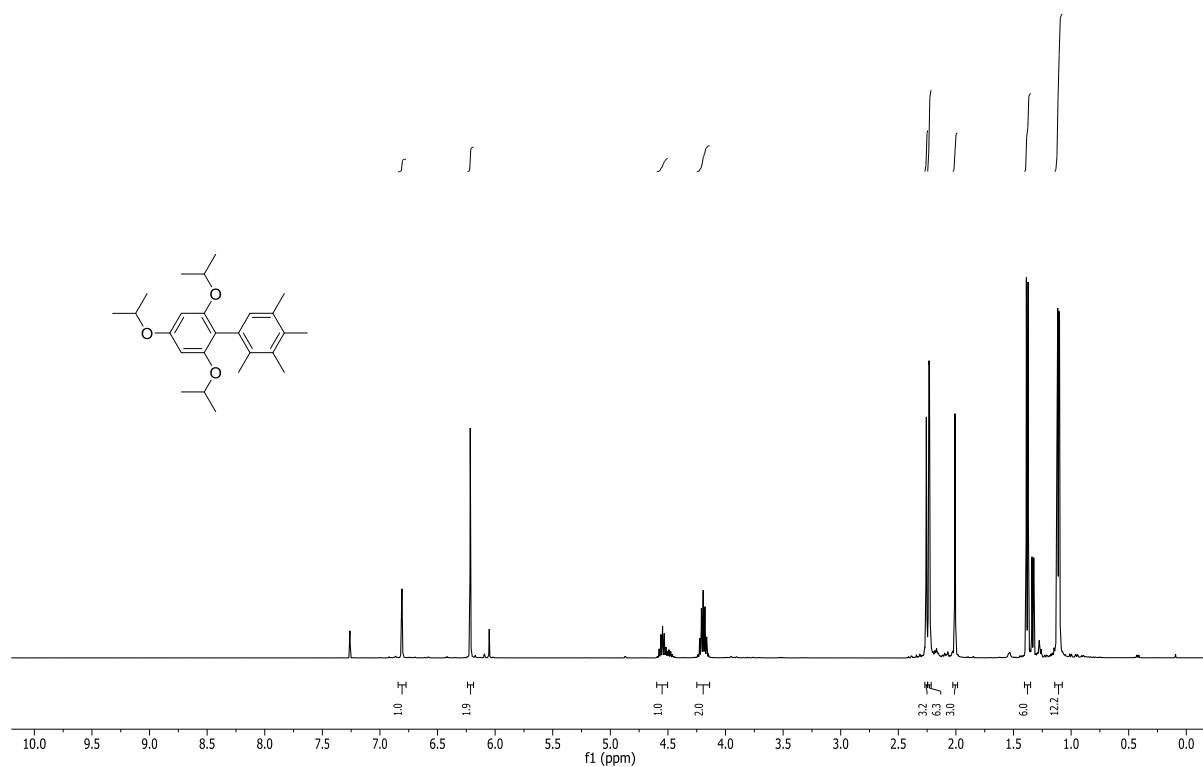

$^{13}\text{C}$  NMR (101 MHz,  $\text{CDCl}_3$ )

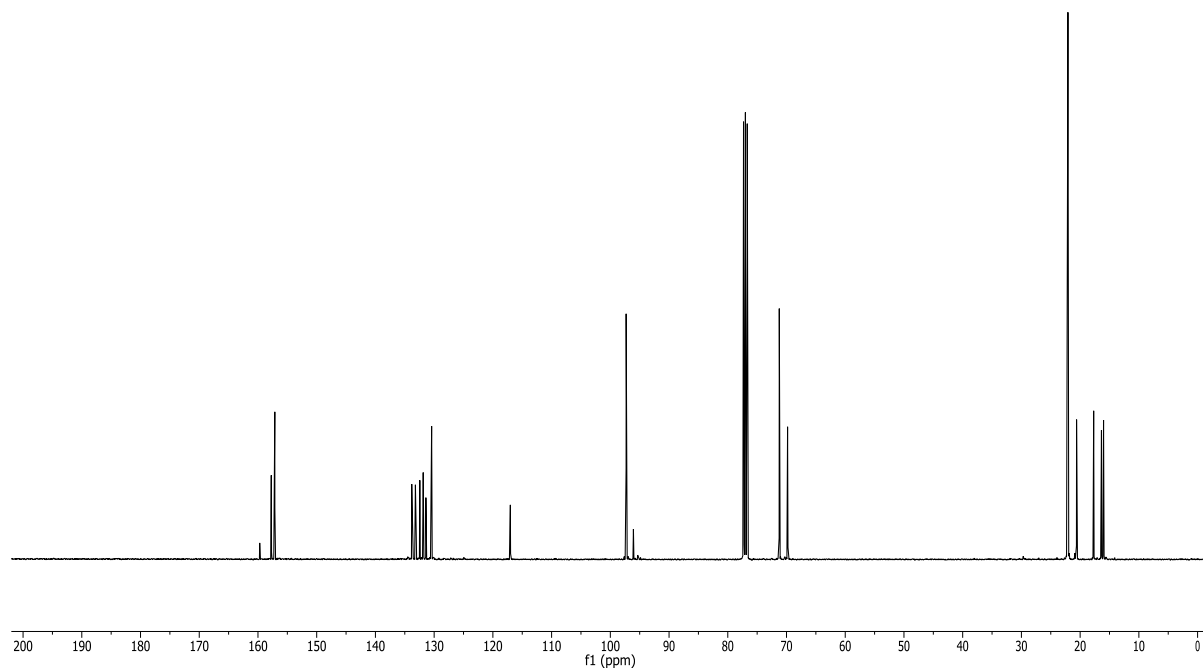

2-ethoxy-4,6-dimethoxy-2',5'-dimethyl-1,1'-biphenyl and 4-ethoxy-2,6-dimethoxy-2',5'-dimethyl-1,1'-biphenyl, **3m**

$^1\text{H}$  NMR (400 MHz,  $\text{CDCl}_3$ )

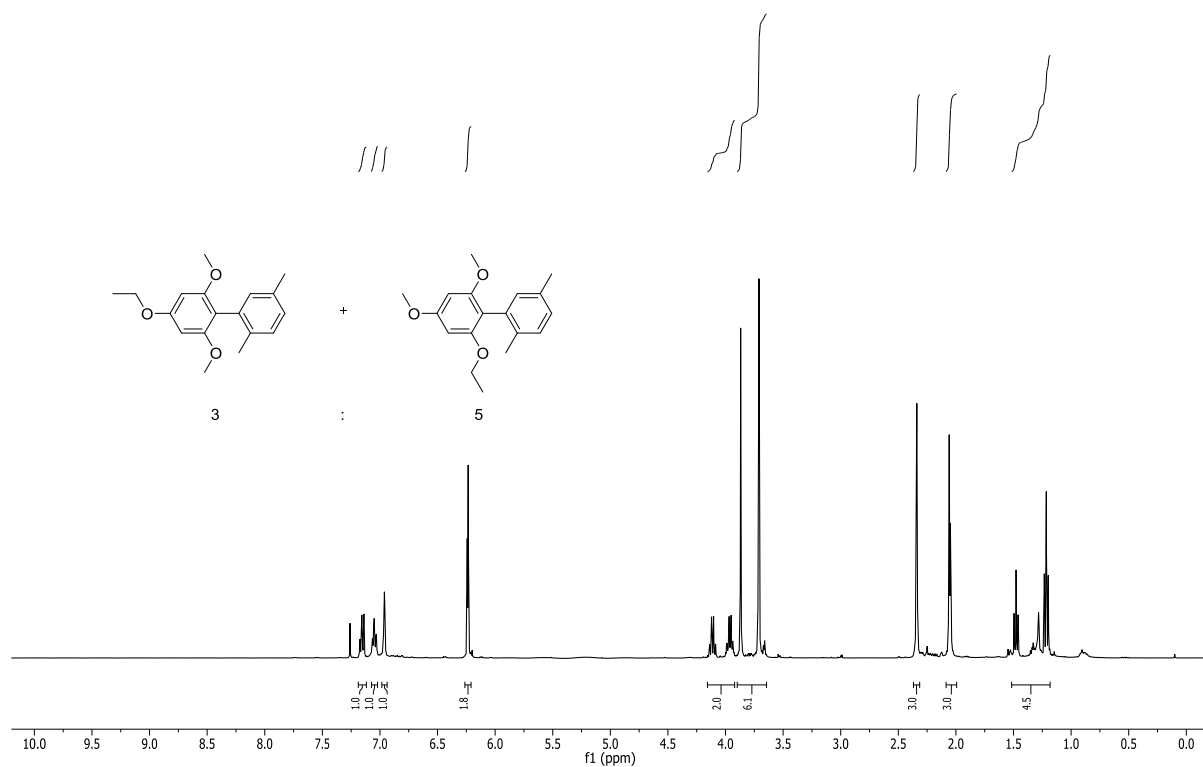

$^{13}\text{C}$  NMR (101 MHz,  $\text{CDCl}_3$ )

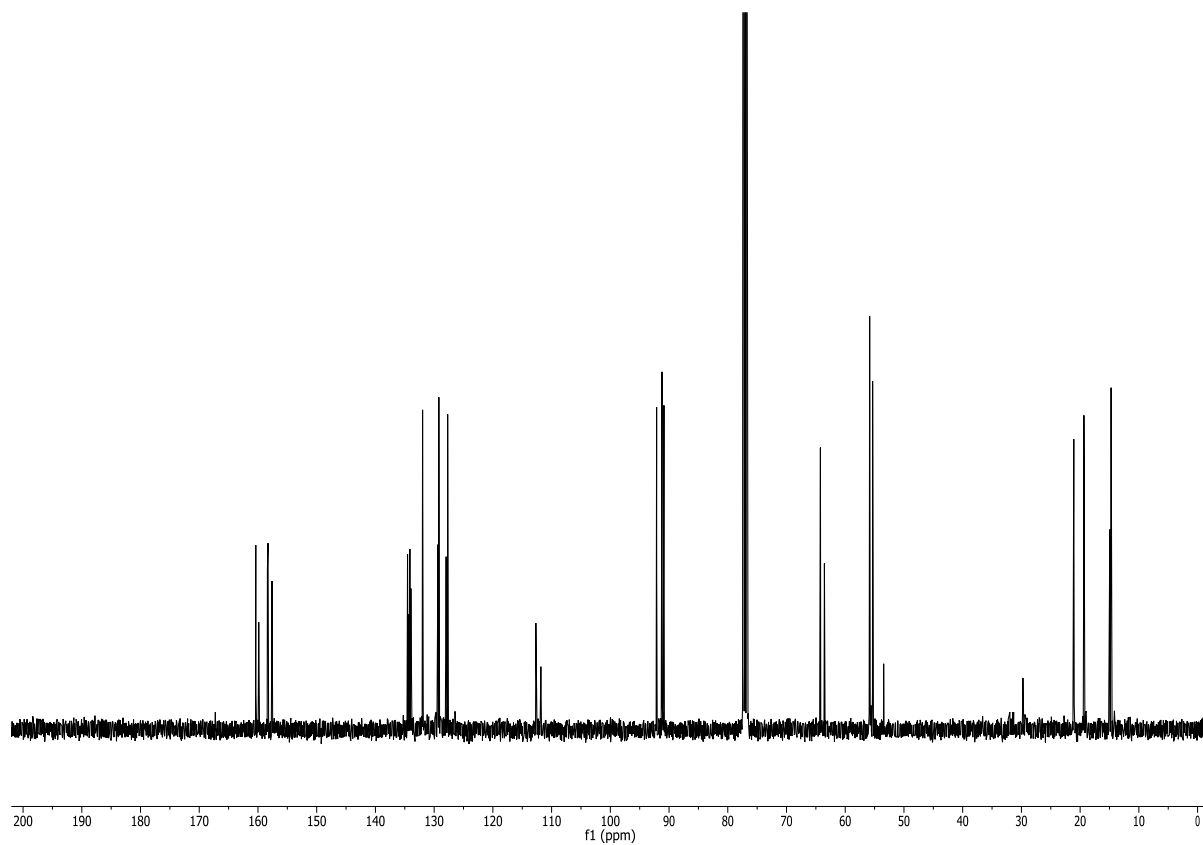

2,4,6-trimethoxy-1,1'-biphenyl, 3n

$^1\text{H}$  NMR (400 MHz,  $\text{CDCl}_3$ )

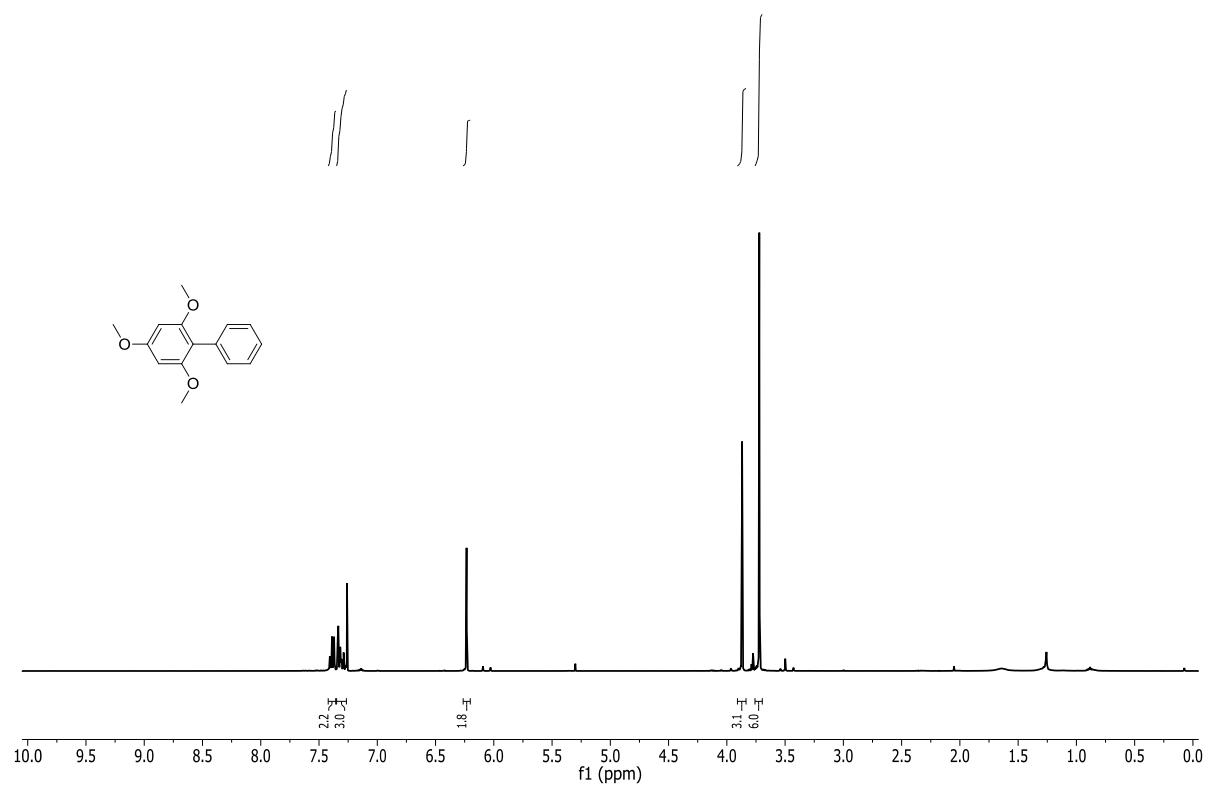

$^{13}\text{C}$  NMR (101 MHz,  $\text{CDCl}_3$ )

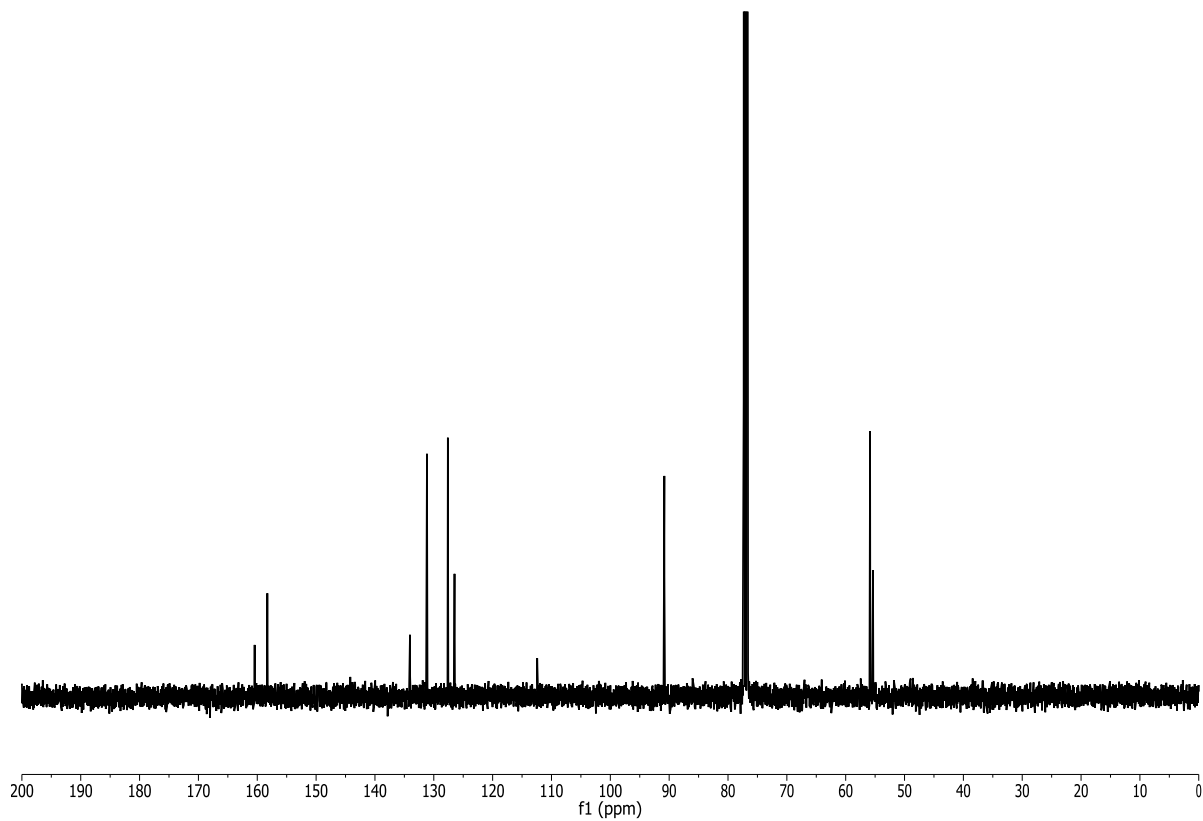

2,4,6-tripropoxy-2',5'-dimethyl-1,1'-biphenyl, **3o**

$^1\text{H}$  NMR (500 MHz,  $\text{CDCl}_3$ )

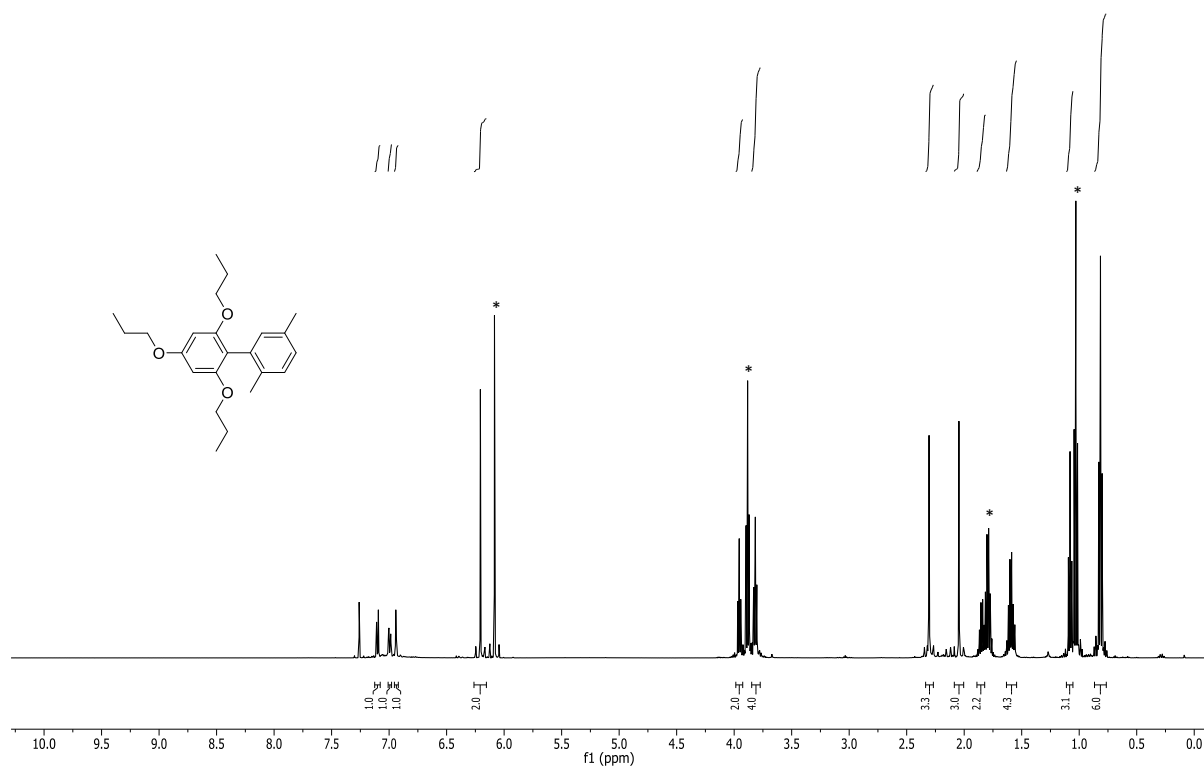

$^{13}\text{C}$  NMR (126 MHz,  $\text{CDCl}_3$ )

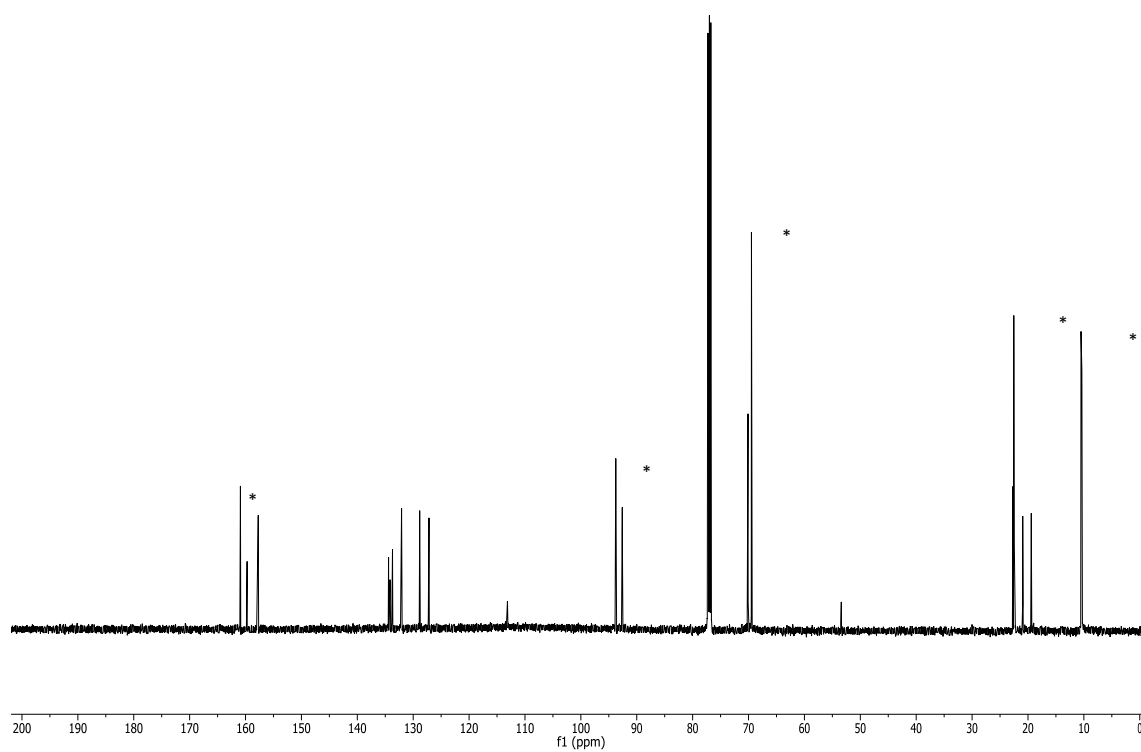

\* - Residual 1,3,5-tripropoxybenzene starting material present in the  $^1\text{H}$  NMR at 6.08, 3.88, 1.79 and 1.03 ppm and  $^{13}\text{C}$  NMR at 160.9, 93.8, 69.5, 22.6 and 10.5. ppm.



2-isopropoxy-4,6-dimethoxy-2',5'-dimethyl-1,1'-biphenyl and 4-isopropoxy-2,6-dimethoxy-2',5'-dimethyl-1,1'-biphenyl, **3p**

$^1\text{H}$  NMR (400 MHz,  $\text{CDCl}_3$ )

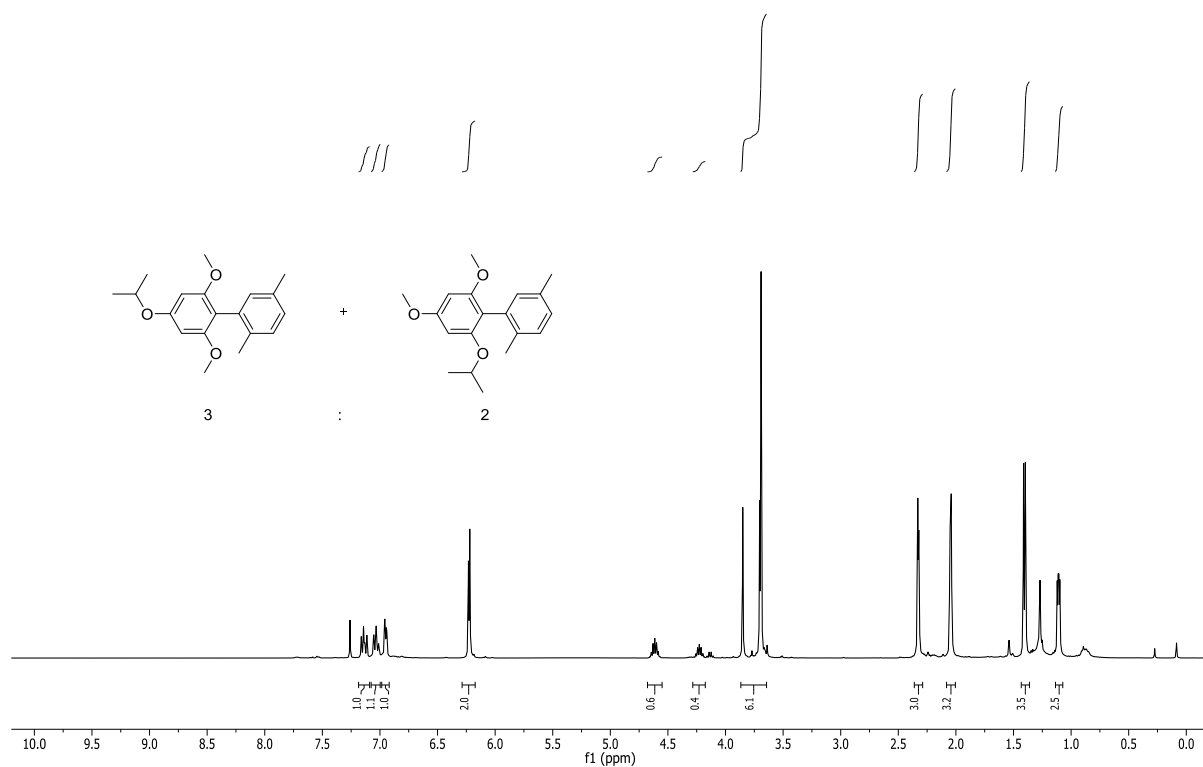

$^{13}\text{C}$  NMR (101 MHz,  $\text{CDCl}_3$ )

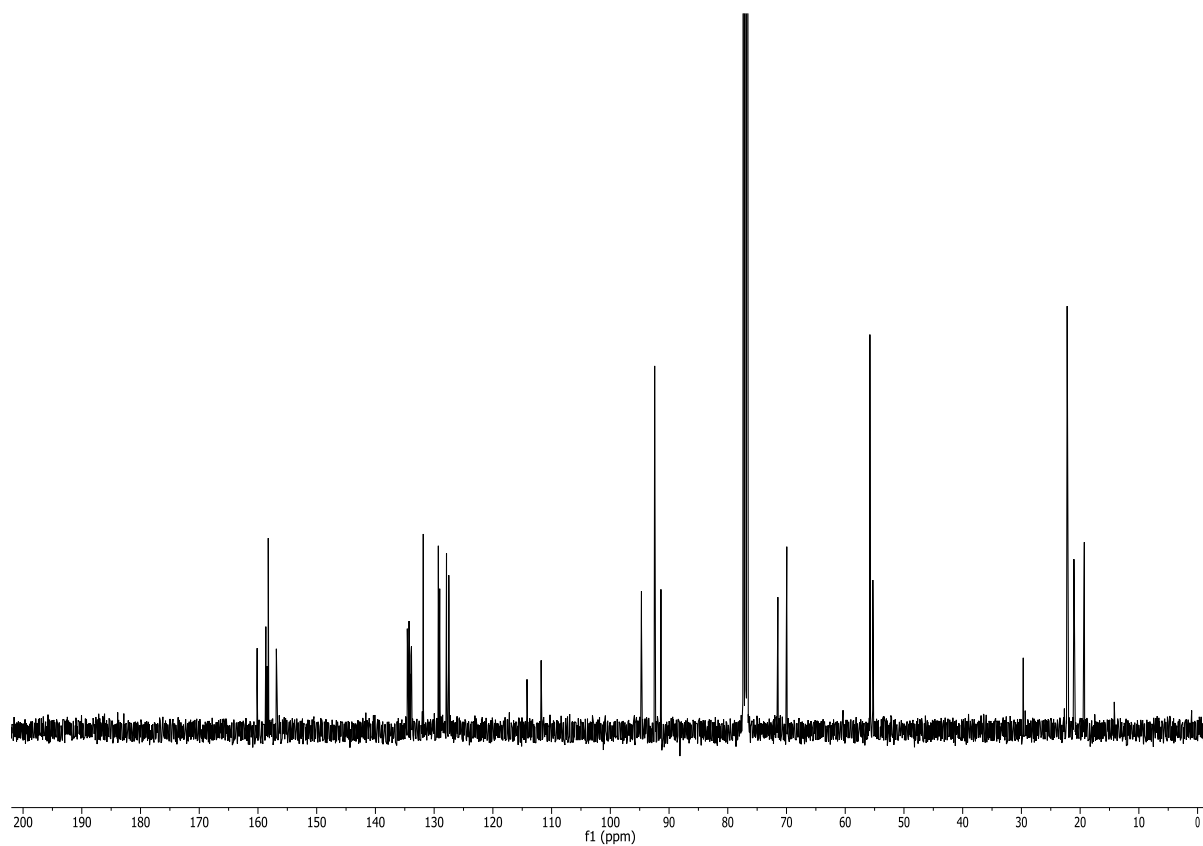

2,4,6-trimethoxy-2'-methyl-4'-*tert*-butyl-1,1'-biphenyl, **3q**

$^1\text{H}$  NMR (500 MHz,  $\text{CDCl}_3$ )

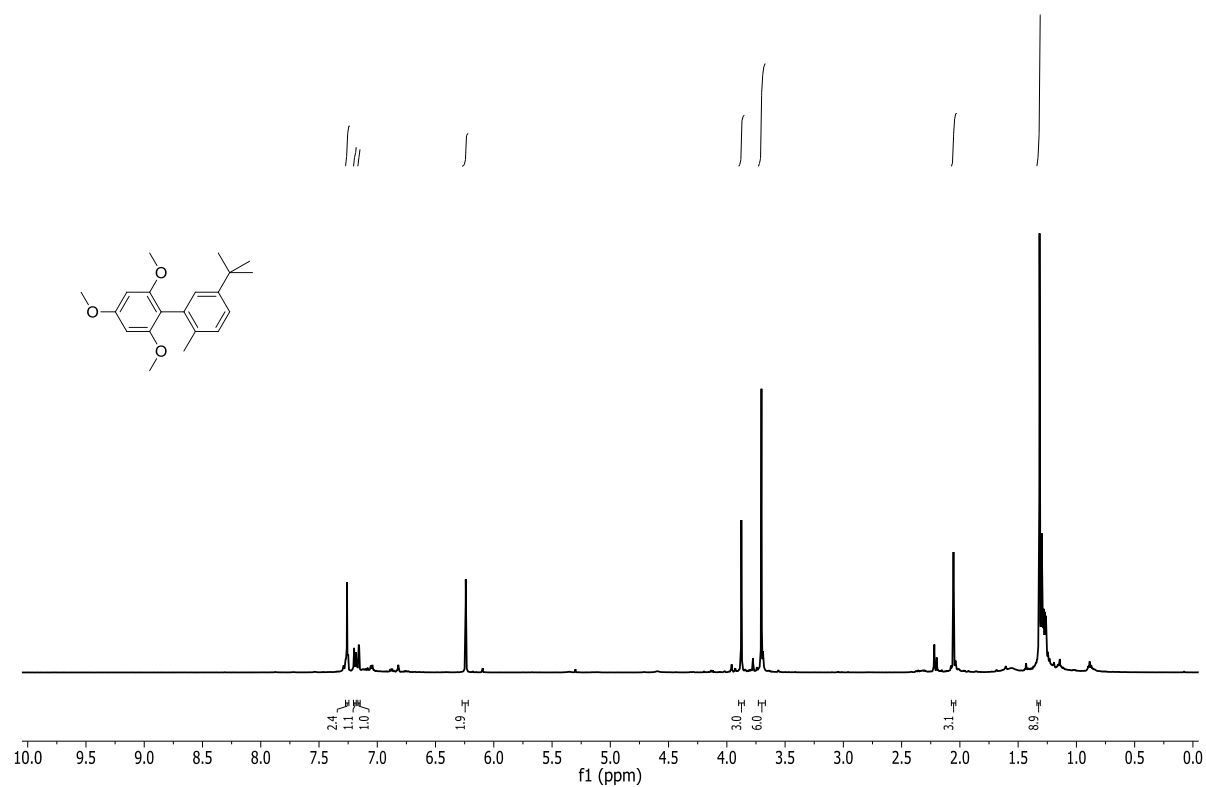

$^{13}\text{C}$  NMR (126 MHz,  $\text{CDCl}_3$ )

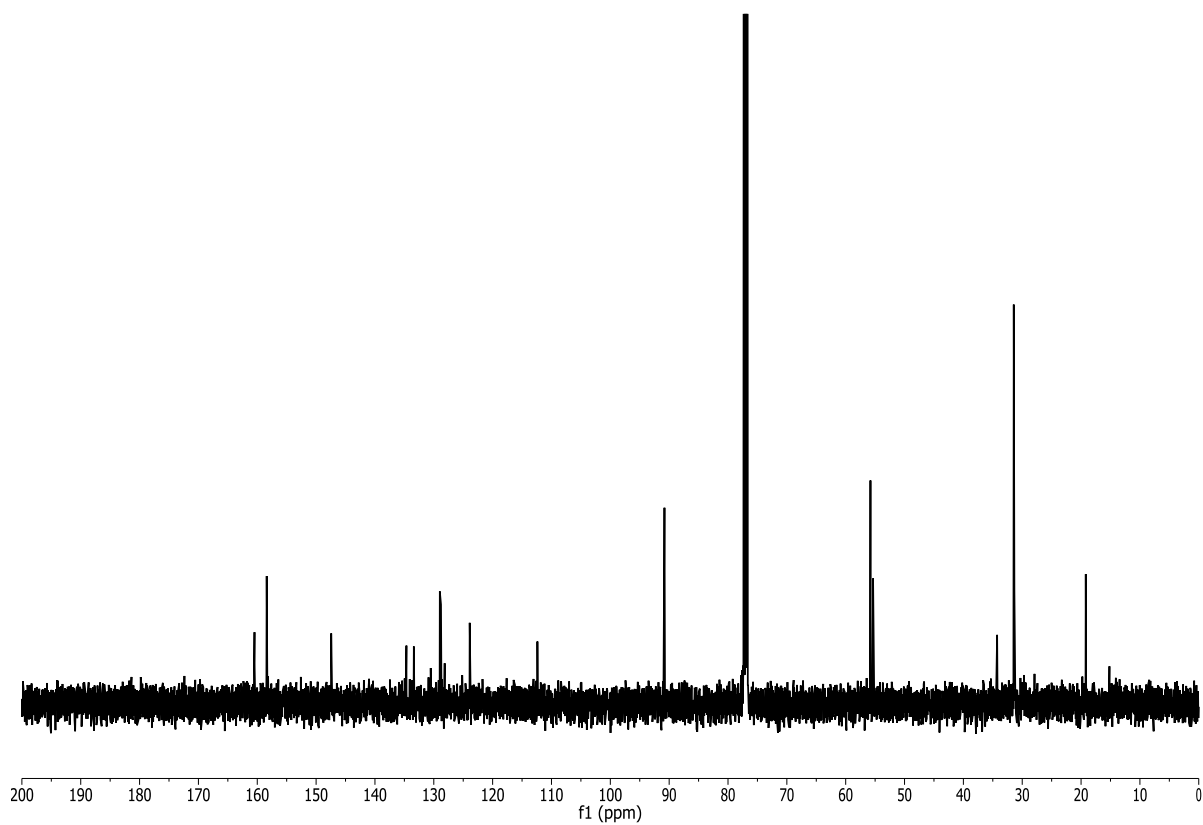

## 5 Deuterium Kinetic Isotope Experiments

**Experiment 1** – Reaction of **1a** with D<sub>10</sub>-**2a** under the benchmark conditions.

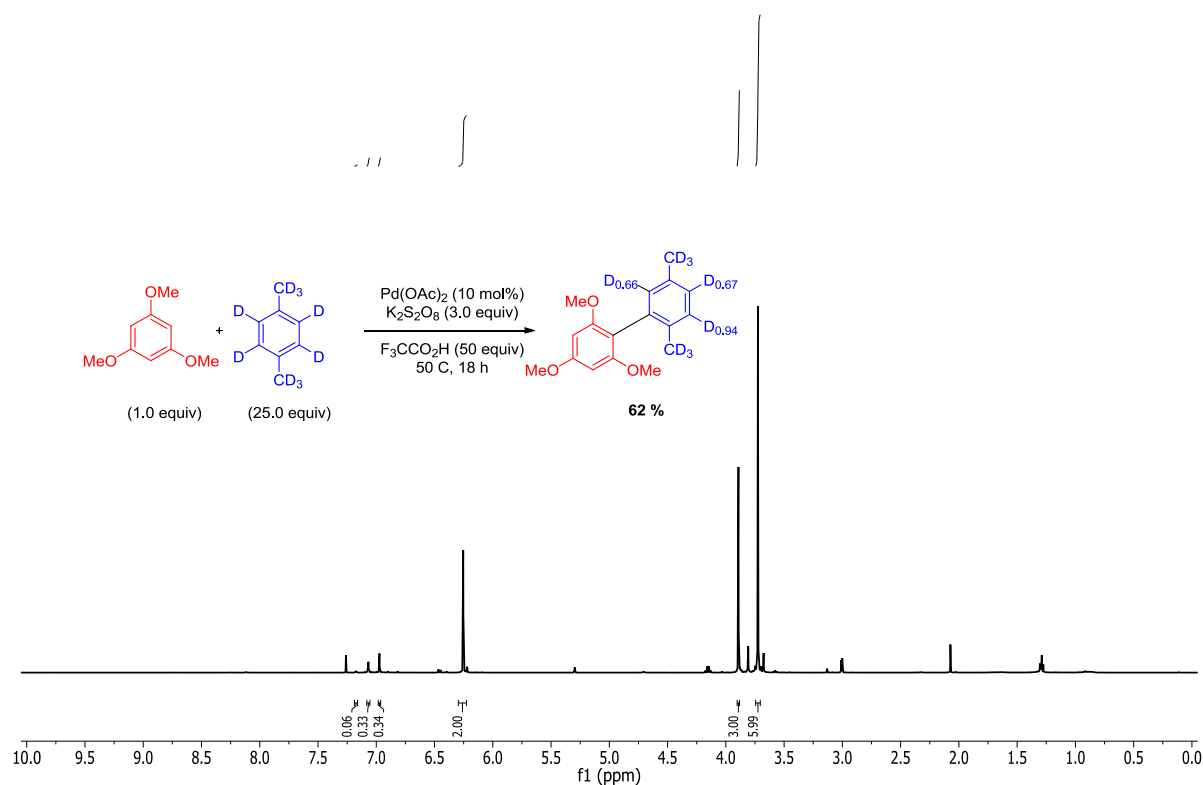

**Experiment 2** – Reaction of **1a** with **2a**:D<sub>10</sub>-**2a** (1:1) under the benchmark conditions.

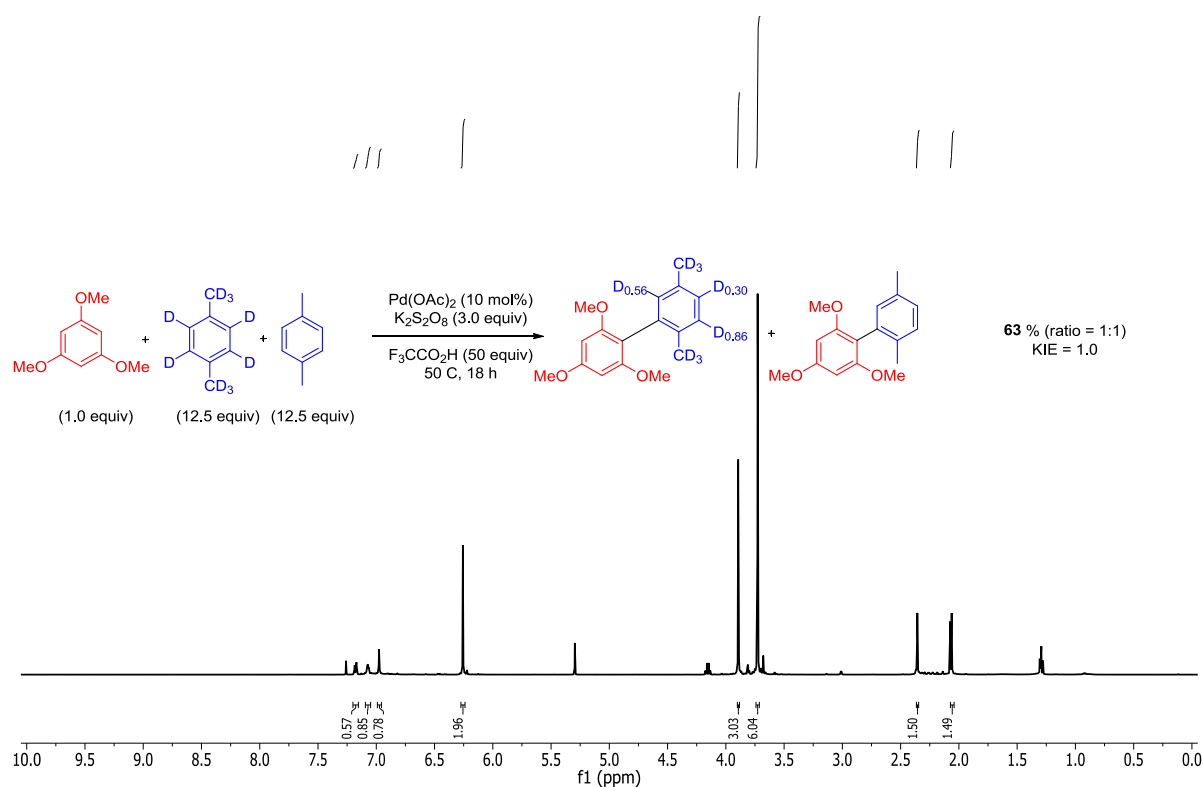

**Experiment 3 – Reaction of **1a** with D<sub>10</sub>-**2a** under the benchmark conditions with deuteriotrifluoroacetic acid.**

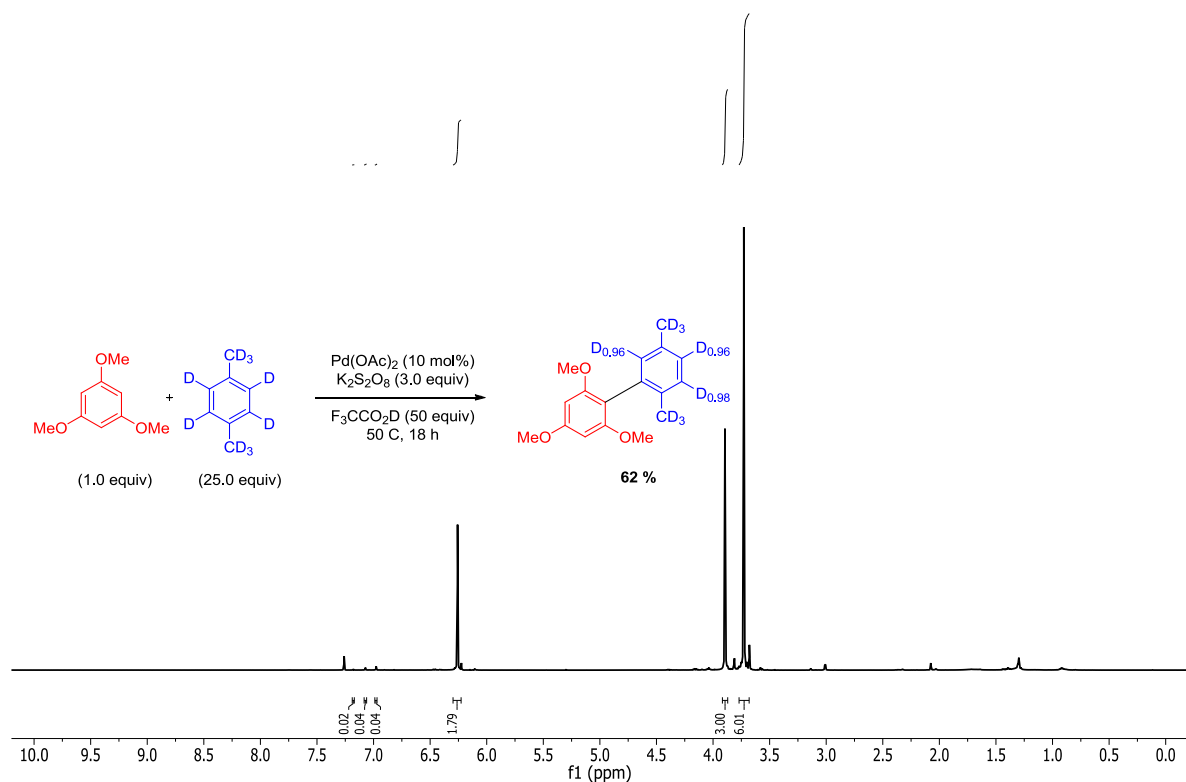

**Experiment 4 – Reaction of **1a** with **2a**:D<sub>10</sub>-**2a** under the benchmark conditions with deuteriotrifluoroacetic acid.**

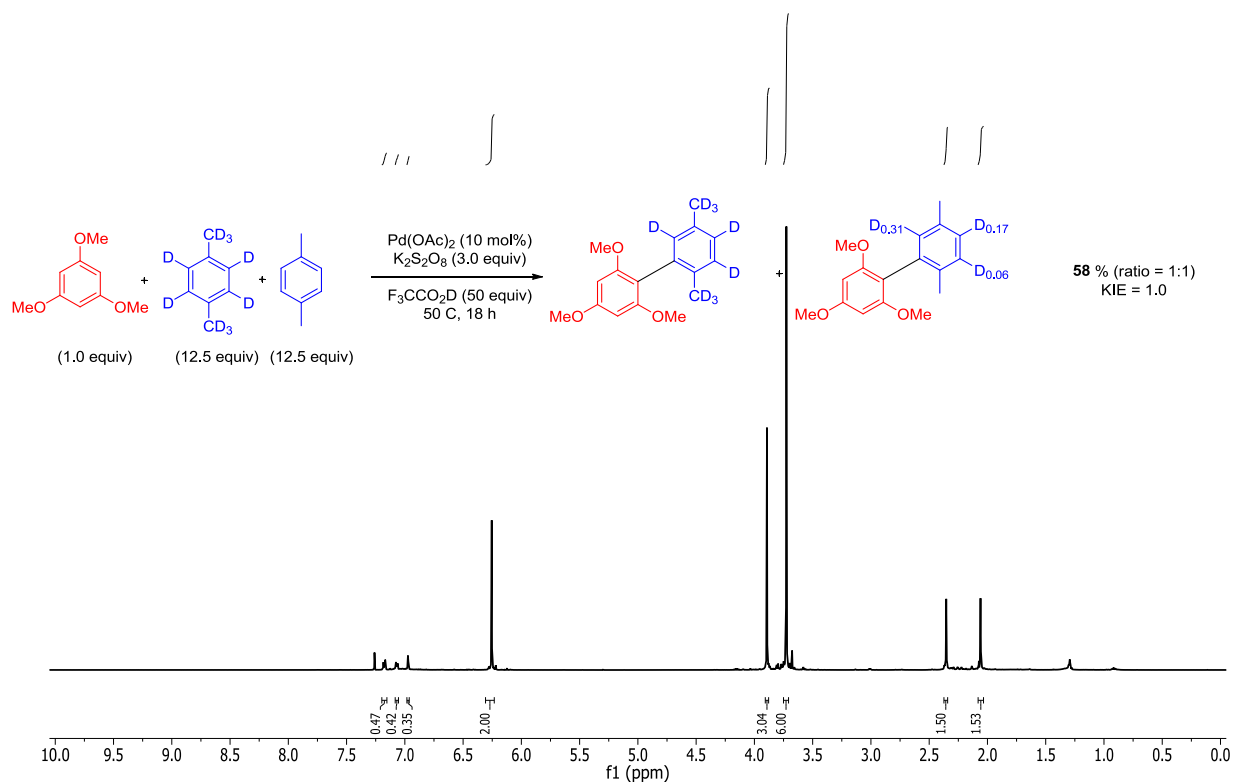

Experiment 5 – Deuterium incorporation control; benchmark conditions with deuteriotrifluoroacetic acid.

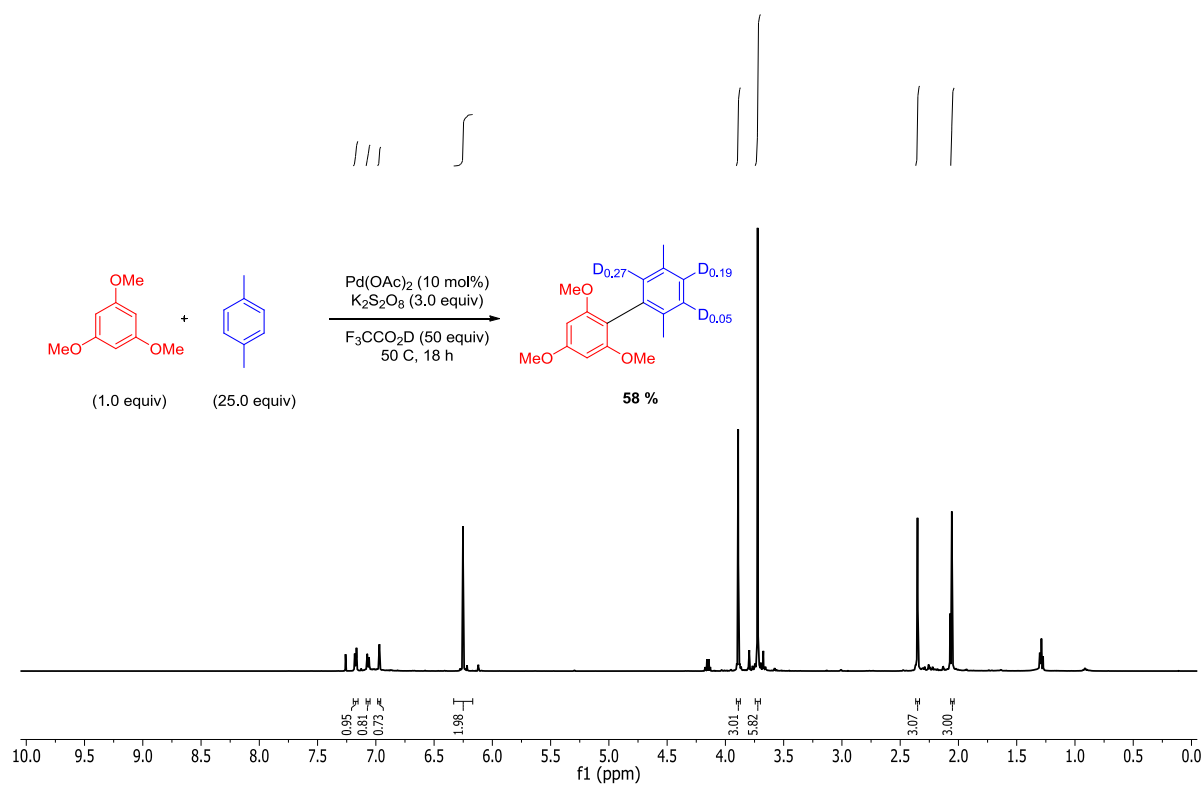

## 6.1 Palladium(II/0) Cycles

The formation of complex **C** could feasibly occur via sequential C-H palladations of the two arene components (**A** → **B** → **C**) or via two different palladations followed by a palladium(II)/palladium(II) transmetalation (**2A** → **B+D** → **C+A**).

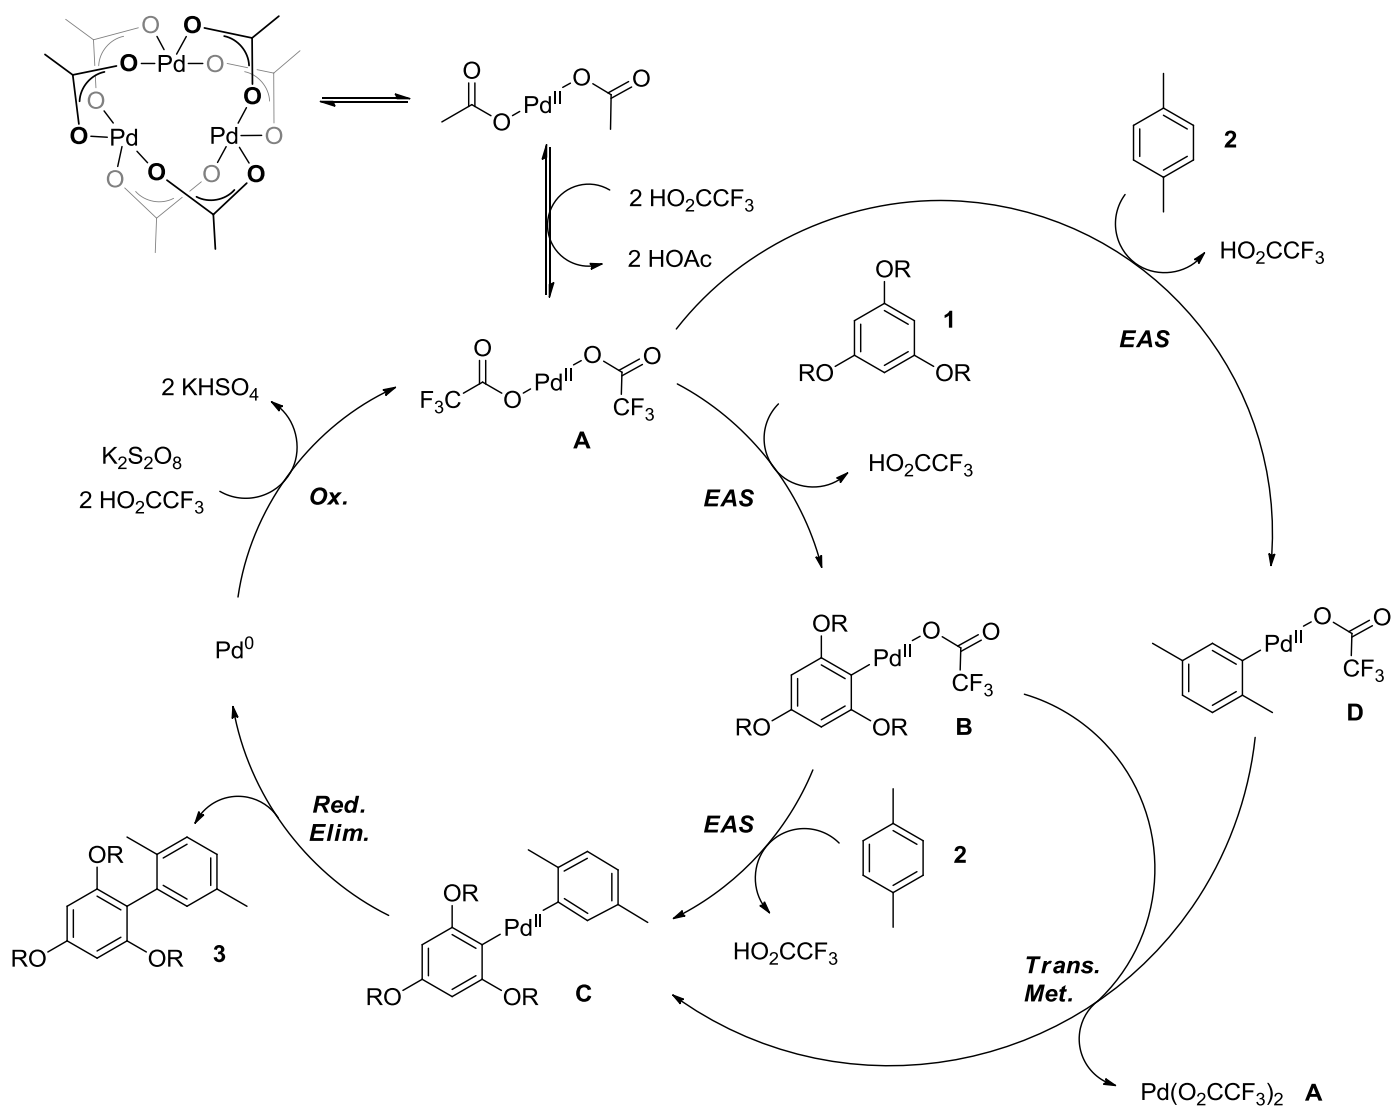

## 6.2 Palladium(II/IV) Cycles

After the formation of complex **C** it is possible that oxidation of the palladium(II) centre could occur generating the palladium(IV) complex **D** which would have a high propensity for reductive elimination.

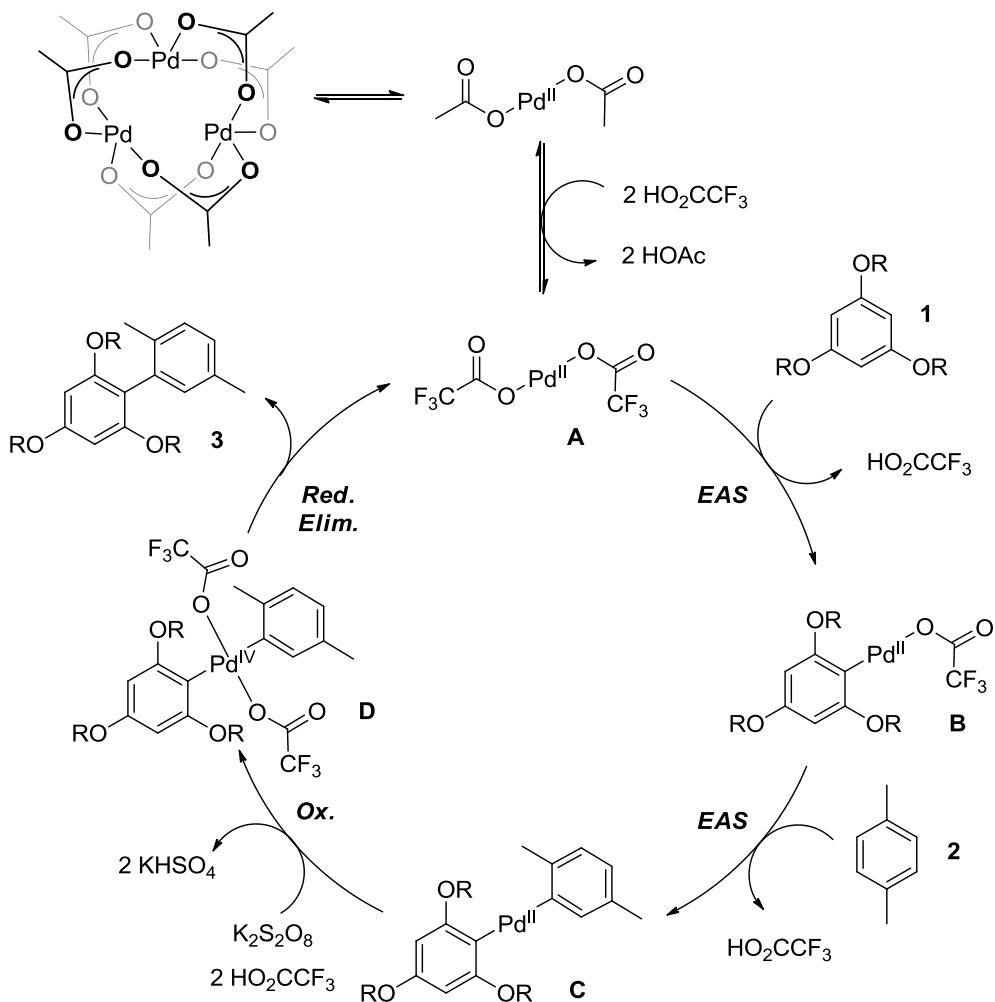

An alternative route to the formation of complex **D** is *via* an intermediate palladium(IV) species such as **E**, although there is less precedent for this class of palladation.

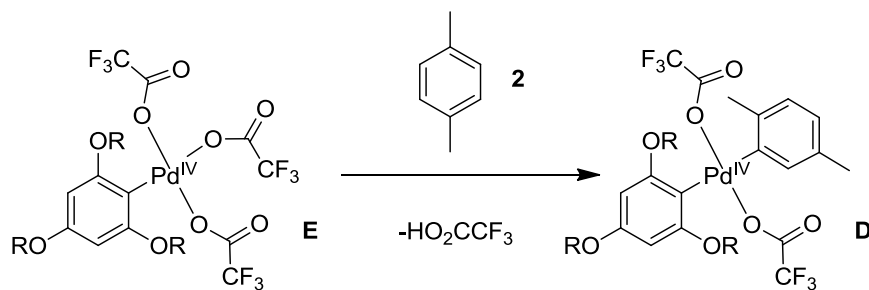

## 7 Crystal Structure of **3a**

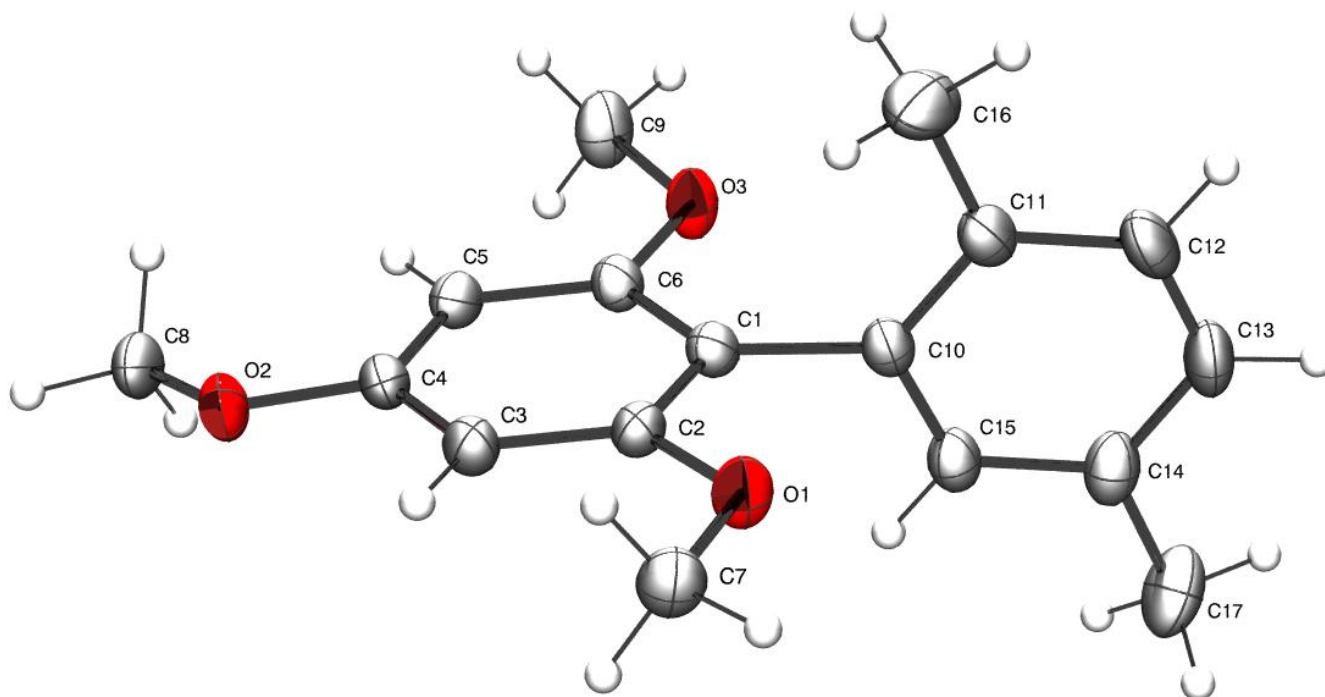

Slow evaporation of a solution of **3a** in EtOAc provided crystals suitable for X-ray crystallographic analysis. X-ray data for 2,4,6-trimethoxy-2',5'-dimethyl-1,1'-biphenyl:  $C_{17}H_{20}O_3$   $M_w = 272.33$ ;  $T = 150(2)$  K;  $\lambda = 1.54178$  Å; Triclinic; P1 space group;  $a = 8.1003(2)$  Å  $b = 9.2891(2)$  Å  $c = 10.3849(2)$  Å;  $\alpha = 74.6760(10)^\circ$ ,  $\beta = 77.4230(10)^\circ$ ,  $\gamma = 79.3020(10)^\circ$ ;  $V = 728.70(3)$  Å<sup>3</sup>;  $Z = 2$ ;  $D = 1.241$  Mg/m<sup>3</sup>; size = 0.19 x 0.18 x 0.15 mm<sup>3</sup>;  $R = 0.0547$ ,  $wR = 0.1788$ ; GoF = 1.093.

## 8 References

- <sup>1</sup> N. Jalalian, B. Olofsson, *Tetrahedron*, **2010**, 66, 5793.
- <sup>2</sup> M. Stephana, B. Zupancic, B. Mohar, *Tetrahedron*, **2011**, 67, 6308.
- <sup>3</sup> F. Alonso, M. Yus, *Tetrahedron*, **1991**, 47, 313.
- <sup>4</sup> J.-J. Dai, J.-H. Liu, D.-F. Luo, L. Liu, *Chem. Commun.*, **2011**, 47, 677.
- <sup>5</sup> E. G. Dennis, D. W. Jeffery, M. V. Perkins, P. A. Smith, *Tetrahedron*, **2011**, 67, 2125.
